# Supplementary material for: 2-Arylcyclopropylmethanol as a substitute for homoallyl aryl alcohol in the construction of cis-2,6-disubstituted tetrahydropyran: synthesis of (±)-centrolobine
Source: Royal Society of Chemistry journal article supplement (doi:10.1039/c4cc07796b), 2014-01-01
Supplement: c4cc07796b1.pdf [file c4cc07796b1.pdf]

Electronic Supplementary Information

on

## 2-Arylcyclopropylmethanol as a substitute for homoallyl aryl alcohol in the construction of *cis*-2,6-disubstituted tetrahydropyran. Synthesis of (±)-centrolobine

Veejendra K. Yadav,\* Ashish K. Verma, Piyush Kumar and Vijaykumar Hulikal

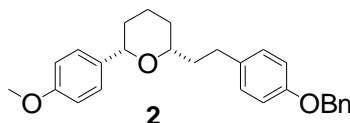

*Reductive de-chlorination:* A solution of **3**, *n*-Bu<sub>3</sub>SnH (0.55 g, 510 μL) and azo-*bis*-isobutyronitrile (10 mg) were taken together in toluene (10 mL) and the resultant reaction mixture was refluxed for 2 h. The solvent was removed under reduced pressure and the residue filtered through a short silica gel column using mixtures of EtOAc and hexanes as the eluant to isolate the product **2**, 0.29 g, 95% yield. <sup>1</sup>H NMR (500 MHz, CDCl<sub>3</sub>): δ 7.43 (2H, d, *J* = 7.0 Hz), 7.40–7.36 (2H, m), 7.33–7.30 (3H, m), 7.11 (2H, d, *J* = 8.5 Hz), 6.90 (2H, d, *J* = 8.5 Hz), 6.88 (2H, d, *J* = 8.5 Hz), 5.03 (2H, s), 4.30 (1H, bd, *J* = 11.0 Hz), 3.80 (3H, s), 3.46–3.41 (1H, m), 2.77–2.64 (2H, m), 1.95–1.86 (2H, m), 1.82 (1H, d, *J* = 12.8 Hz), 1.76–1.69 (1H, m), 1.66–1.58 (2H, m), 1.54–1.46 (1H, m), 1.37–1.28 (1H, m). <sup>13</sup>C NMR (125 MHz, CDCl<sub>3</sub>): δ 158.7, 156.8, 137.2, 135.9, 134.9, 129.4, 128.5, 127.9, 127.5, 127.0, 114.6, 113.6, 79.0, 77.1, 70.0, 55.3, 38.3, 33.3, 31.2, 30.7, 24.0. IR: ν<sub>max</sub> cm<sup>-1</sup> 1611, 1511, 1453, 1244, 1174, 1078, 1036, 827, 735. Calculated *m/z* for [M + H]<sup>+</sup> = 403.2273, observed *m/z* = 403.2277.

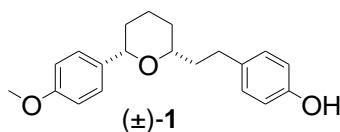

*Hydrogenolysis:* The product **2** above was taken in methanol (10 mL) and mixed with 5% Pd-C (10 mg). The resultant mixture was fitted with a hydrogen balloon and stirred at 30 °C for 2 h. It was filtered through a short silica gel column using mixtures of EtOAc and hexanes as the eluant to isolate (±)-centrolobine **1**, 0.22 g, 98% yield.

<sup>1</sup>H NMR (500 MHz, CDCl<sub>3</sub>): δ 7.30 (2H, d, *J* = 8.5 Hz), 7.05 (2H, d, *J* = 8.5 Hz), 6.88 (2H, d, *J* = 8.5 Hz), 6.73 (2H, d, *J* = 8.5 Hz), 4.69 (1H, bs), 4.29 (1H, dd, *J* = 9.8, 1.2 Hz), 3.80 (3H, s), 3.46–3.40 (1H, m), 2.74–2.63 (2H, m), 1.94–1.85 (2H, m), 1.82 (1H, bd, *J* = 12.5 Hz), 1.75–1.68 (1H, m), 1.67–1.58 (2H, m), 1.50 (1H, ddd, *J* = 15.3, 11.7, 4.0 Hz), 1.32 (1H, ddd, *J* = 15.3, 11.0, 4.0 Hz). <sup>13</sup>C

NMR (125 MHz, CDCl<sub>3</sub>):  $\delta$  158.8, 153.5, 136.0, 134.8, 129.7, 127.2, 115.2, 113.7, 79.2, 77.2, 55.4, 38.4, 33.4, 31.3, 30.8, 24.1. IR:  $\nu_{\max}$  cm<sup>-1</sup> 3380, 1613, 1514, 1454, 1247, 1175, 1076, 1035, 828. Calcd  $m/z$  for [M + H]<sup>+</sup> = 313.1804, Observed  $m/z$  = 313.1807.

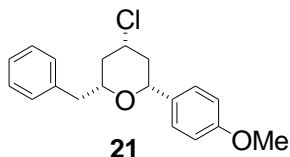

**21**: solid, mp 80 °C. <sup>1</sup>H NMR (500 MHz, CDCl<sub>3</sub>):  $\delta$  7.31–7.22 (7H, m), 6.88 (2H, d,  $J$  = 8.6 Hz), 4.33 (1H, dd,  $J$  = 11.3, 1.6 Hz), 4.11–4.05 (1H, m), 3.80 (3H, s), 3.72–3.66 (1H, m), 3.05 (1H, dd,  $J$  = 13.7, 5.5 Hz), 2.77 (1H, dd,  $J$  = 13.7, 7.0 Hz), 2.33 (1H, md,  $J$  = 15.0 Hz), 2.16 (1H, md,  $J$  = 15.0 Hz), 1.81 (1H, dd,  $J$  = 24.0, 11.6 Hz), 1.61 (1H, dd,  $J$  = 24.0, 11.6 Hz). <sup>13</sup>C NMR (125 MHz, CDCl<sub>3</sub>):  $\delta$  159.2, 137.8, 133.7, 129.7, 128.4, 127.2, 126.5, 113.9, 78.3, 78.0, 56.0, 55.4, 44.2, 42.5, 41.4. IR:  $\nu_{\max}$  cm<sup>-1</sup> 1612, 1514, 1248, 1175, 1154, 1077, 1034, 990, 827, 788, 750, 700. Calcd  $m/z$  for [M + H]<sup>+</sup> = 317.1308, Observed  $m/z$  = 317.1306.

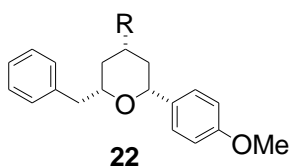

**22**: Colorless viscous liquid. <sup>1</sup>H NMR (500 MHz, CDCl<sub>3</sub>):  $\delta$  7.30–7.18 (7H, m), 6.87 (2H, d,  $J$  = 8.9 Hz), 4.32 (1H, dd,  $J$  = 11.2, 2.0 Hz), 3.79 (3H, s), 3.01 (1H, dd,  $J$  = 13.7, 6.0 Hz), 2.72 (1H, dd,  $J$  = 13.7, 7.2 Hz), 1.92–1.86 (1H, md,  $J$  = 12.3 Hz), 1.79 (1H, bd,  $J$  = 12.3 Hz), 1.64–1.54 (2H, m), 1.49 (1H, ddd,  $J$  = 14.9, 11.2, 3.7 Hz), 1.29 (1H, ddd,  $J$  = 14.9, 10.9, 3.7 Hz). <sup>13</sup>C NMR (125 MHz, CDCl<sub>3</sub>):  $\delta$  158.7, 138.9, 135.8, 129.6, 128.1, 127.0, 126.0, 113.6, 79.3, 79.2, 55.3, 43.2, 33.4, 30.5, 23.9. IR:  $\nu_{\max}$  cm<sup>-1</sup> 1612, 1514, 1454, 1247, 1174, 1080, 1035, 827, 748, 700. Calcd  $m/z$  for [M + H]<sup>+</sup> = 283.1698, Observed  $m/z$  = 283.1695.

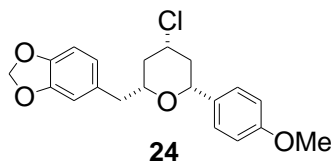

**24**: Solid, mp 82 °C. <sup>1</sup>H NMR (400 MHz, CDCl<sub>3</sub>):  $\delta$  7.27 (2H, d,  $J$  = 8.7 Hz), 6.89 (2H, d,  $J$  = 8.7 Hz), 6.75–6.72 (2H, m), 6.67 (1H, d,  $J$  = 7.8 Hz), 5.93 (2H, s), 4.33 (1H, bd,  $J$  = 11.5 Hz), 4.13–4.06 (1H, m), 3.80 (3H, s), 3.67–3.60 (1H, m), 2.96 (1H, dd,  $J$  = 13.7, 5.6 Hz), 2.70 (1H, dd,  $J$  = 13.7, 6.8 Hz), 2.37–2.31 (1H, m), 2.18–2.13 (1H, m), 1.80 (1H, dd,  $J$  = 24.0, 12.0 Hz), 1.59 (1H, dd,  $J$  = 24.0, 11.7 Hz). <sup>13</sup>C NMR (125 MHz, CDCl<sub>3</sub>):  $\delta$  159.1, 147.5, 146.1, 133.6, 131.4, 127.1, 122.5, 113.8, 109.9, 108.1, 100.8, 78.3, 77.9, 55.9, 55.4, 44.1, 41.9, 41.2. Calcd  $m/z$  for [M + Na]<sup>+</sup> = 383.1026, Observed  $m/z$  = 383.1021.

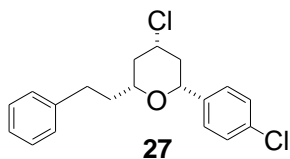

**27:** Colorless viscous liquid.  $^1\text{H}$  NMR (500 MHz,  $\text{CDCl}_3$ ):  $\delta$  7.34–7.16 (5H, m), 4.32 (1H, dd,  $J = 9.8, 1.2$  Hz), 4.15–4.08 (1H, m), 3.48–3.42 (1H, m), 2.83–2.70 (2H, m), 2.38–2.34 (1H, m), 2.22–2.18 (1H, m), 2.04–1.95 (1H, m), 1.86–1.81 (1H, m), 1.76 (1H, q,  $J = 12.0$  Hz), 1.67 (1H, q,  $J = 12.0$  Hz).  $^{13}\text{C}$  NMR (125 MHz,  $\text{CDCl}_3$ ):  $\delta$  141.7, 140.0, 133.3, 128.6, 128.5, 128.4, 127.1, 125.9, 77.6, 75.8, 55.5, 44.0, 42.0, 37.2, 31.5. IR:  $\nu_{\text{max}}$   $\text{cm}^{-1}$  1600, 1493, 1454, 1351, 1322, 1158, 1125, 1087, 1014, 823, 763. Calcd  $m/z$  for  $[\text{M}]^+ = 334.0891$ , Observed  $m/z = 334.0897$ .

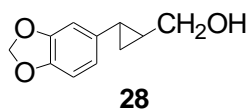

**28.** Colorless liquid.  $^1\text{H}$  NMR (400 MHz,  $\text{CDCl}_3$ ):  $\delta$  6.69 (1H, d,  $J = 7.8$  Hz), 6.56 (1H, dd,  $J = 7.8, 1.8$  Hz), 6.53 (1H, d,  $J = 1.8$  Hz), 3.57 (2H, d,  $J = 6.9$  Hz), 1.79–1.73 (1H, m), 1.39–1.31 (1H, m), 0.88–0.83 (2H, m).  $^{13}\text{C}$  NMR (100 MHz,  $\text{CDCl}_3$ ):  $\delta$  147.7, 145.6, 136.3, 119.1, 108.0, 106.4, 100.8, 66.5, 24.8, 21.1, 13.3. IR:  $\nu_{\text{max}}$   $\text{cm}^{-1}$  3360, 2882, 1609, 1505, 1494, 1464, 1440, 1254, 1235, 1208, 1182, 1077, 1039, 934, 886, 853, 810. Calcd  $m/z$  for  $[\text{M}]^+ = 192.0786$ , Observed  $m/z = 192.0778$ .

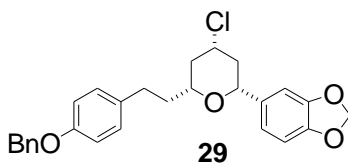

**29:** White solid, mp 48 °C.  $^1\text{H}$  NMR (400 MHz,  $\text{CDCl}_3$ ):  $\delta$  7.43–7.29 (5H, m), 7.08 (2H, d,  $J = 8.6$  Hz), 6.89 (2H, d,  $J = 8.6$  Hz), 6.87 (1H, s), 6.79–6.78 (2H, m), 5.94 (2H, s), 5.03 (2H, s), 4.25 (1H, dd,  $J = 11.4, 1.2$  Hz), 4.14–4.06 (1H, m), 3.44–3.38 (1H, m), 2.76–2.62 (2H, m), 2.36–2.30 (1H, m), 2.18–2.14 (1H, m), 1.98–1.90 (1H, m), 1.80–1.72 (1H, m), 1.78 (1H, q,  $J = 12.3$  Hz), 1.64 (1H, q,  $J = 12.3$  Hz).  $^{13}\text{C}$  NMR (100 MHz,  $\text{CDCl}_3$ ):  $\delta$  157.0, 147.7, 147.0, 137.2, 135.5, 134.1, 129.4, 128.6, 127.9, 127.5, 119.2, 114.7, 108.0, 106.6, 101.0, 78.0, 75.8, 70.0, 55.7, 44.2, 42.1, 37.5, 30.5. IR:  $\nu_{\text{max}}$   $\text{cm}^{-1}$  1610, 1509, 1489, 1443, 1240, 1069, 1038, 934, 741. Calcd  $m/z$  for  $[\text{M} + \text{Na}]^+ = 473.1496$ , Observed  $m/z = 473.1493$ .

546\_1H-4.jdf

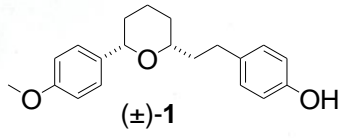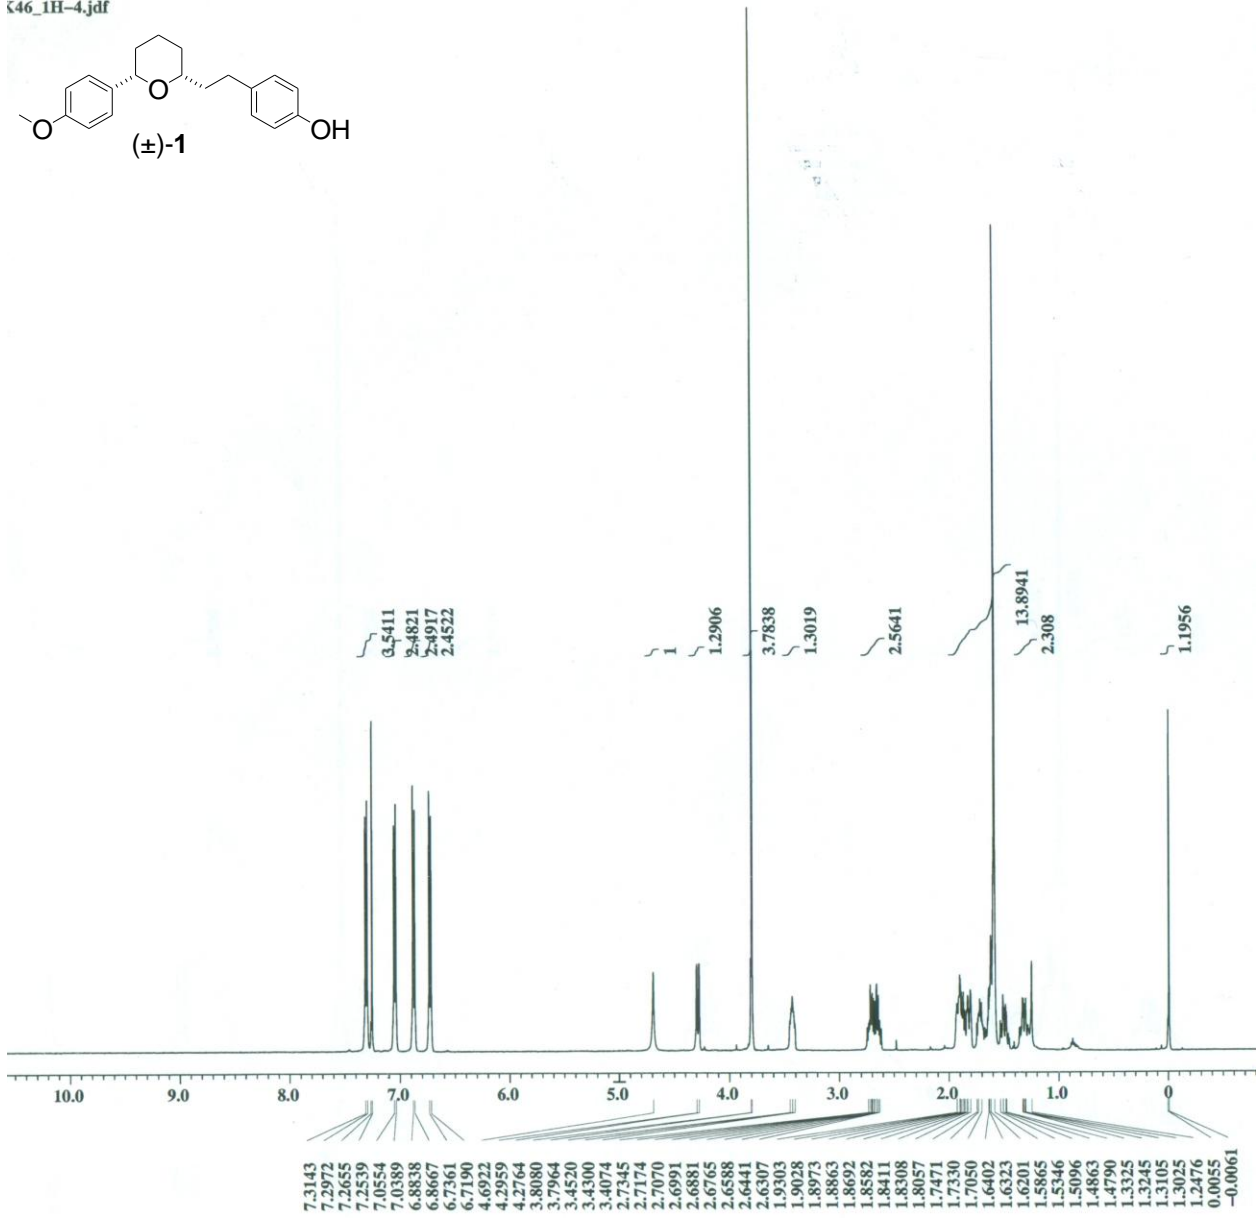

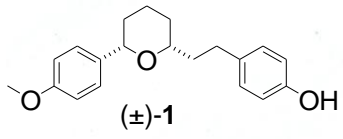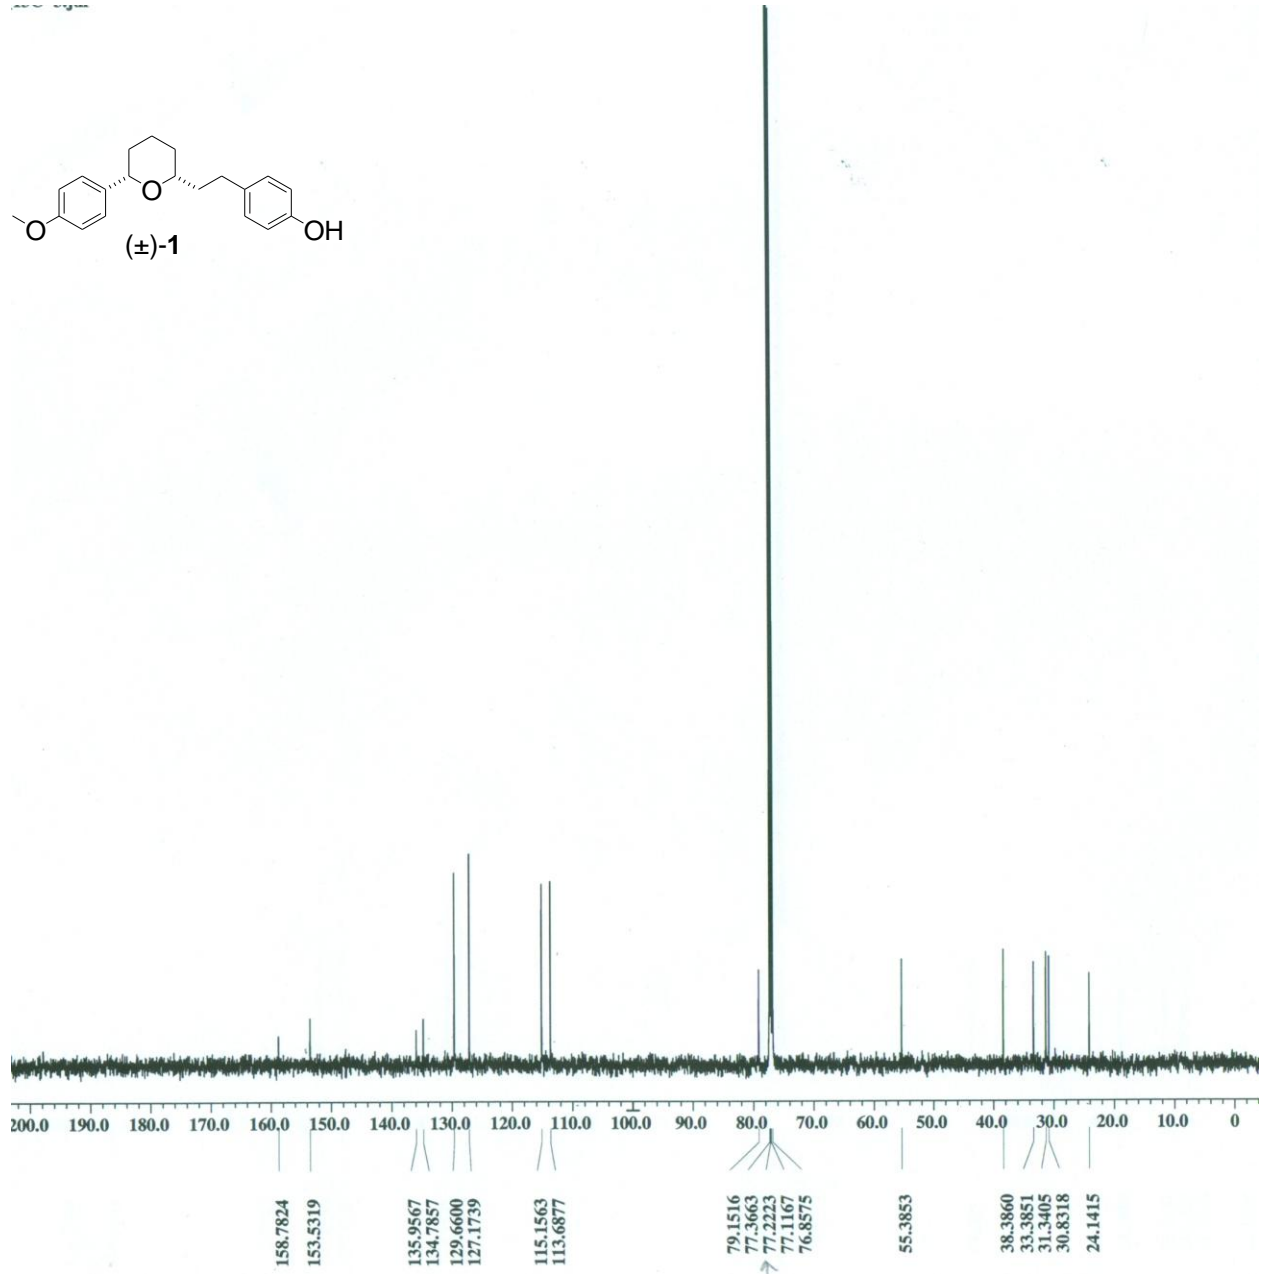

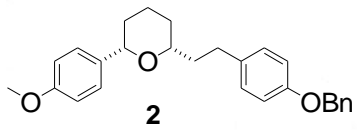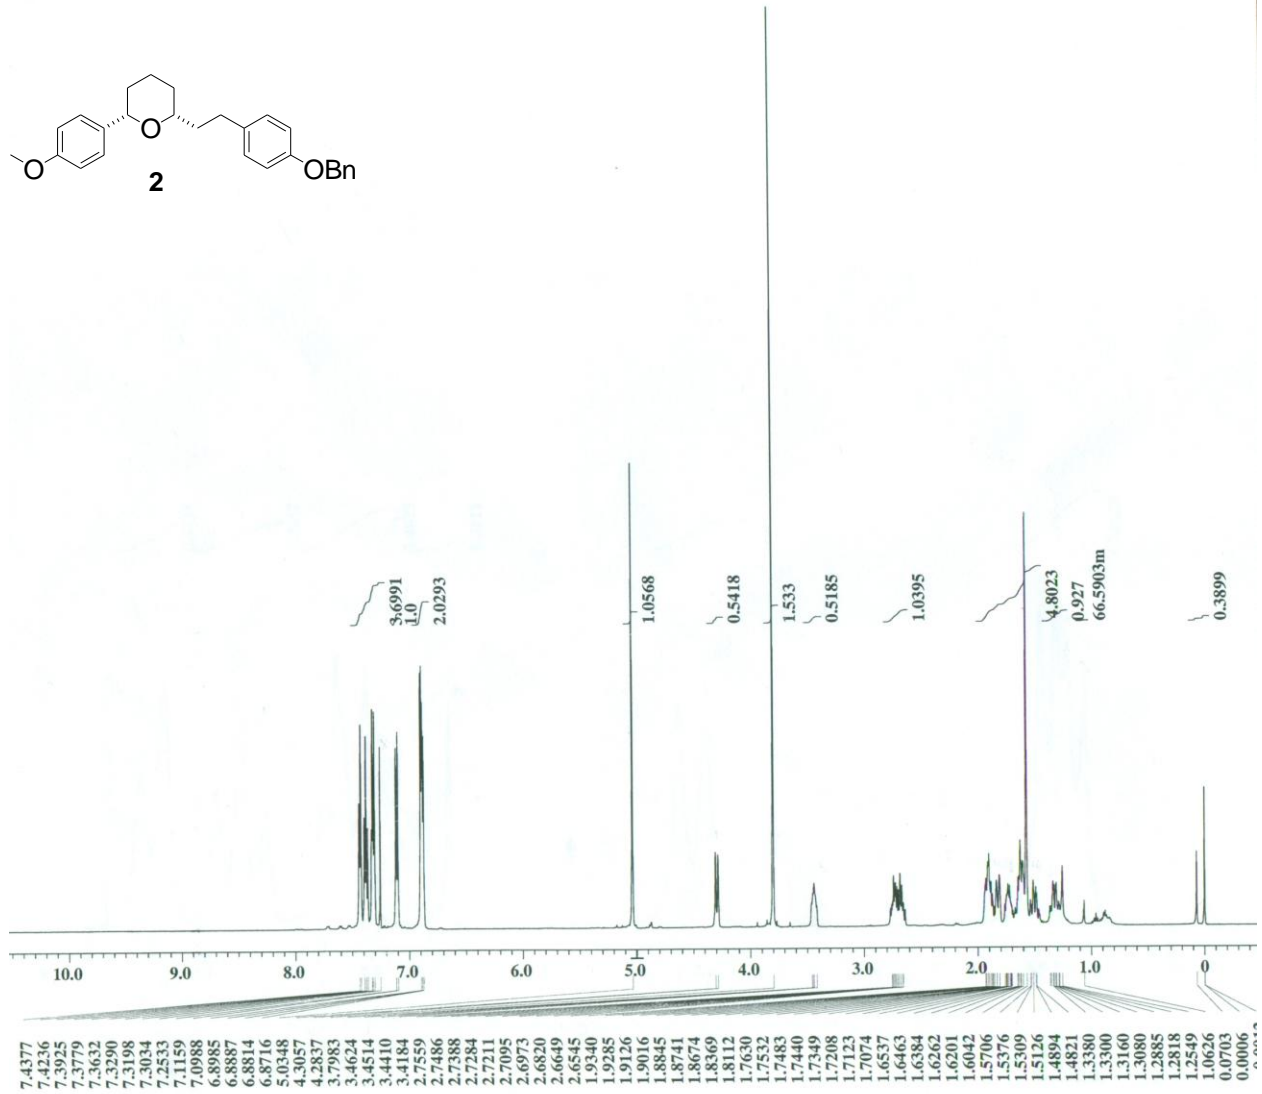

KKY01\_13C

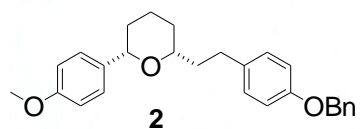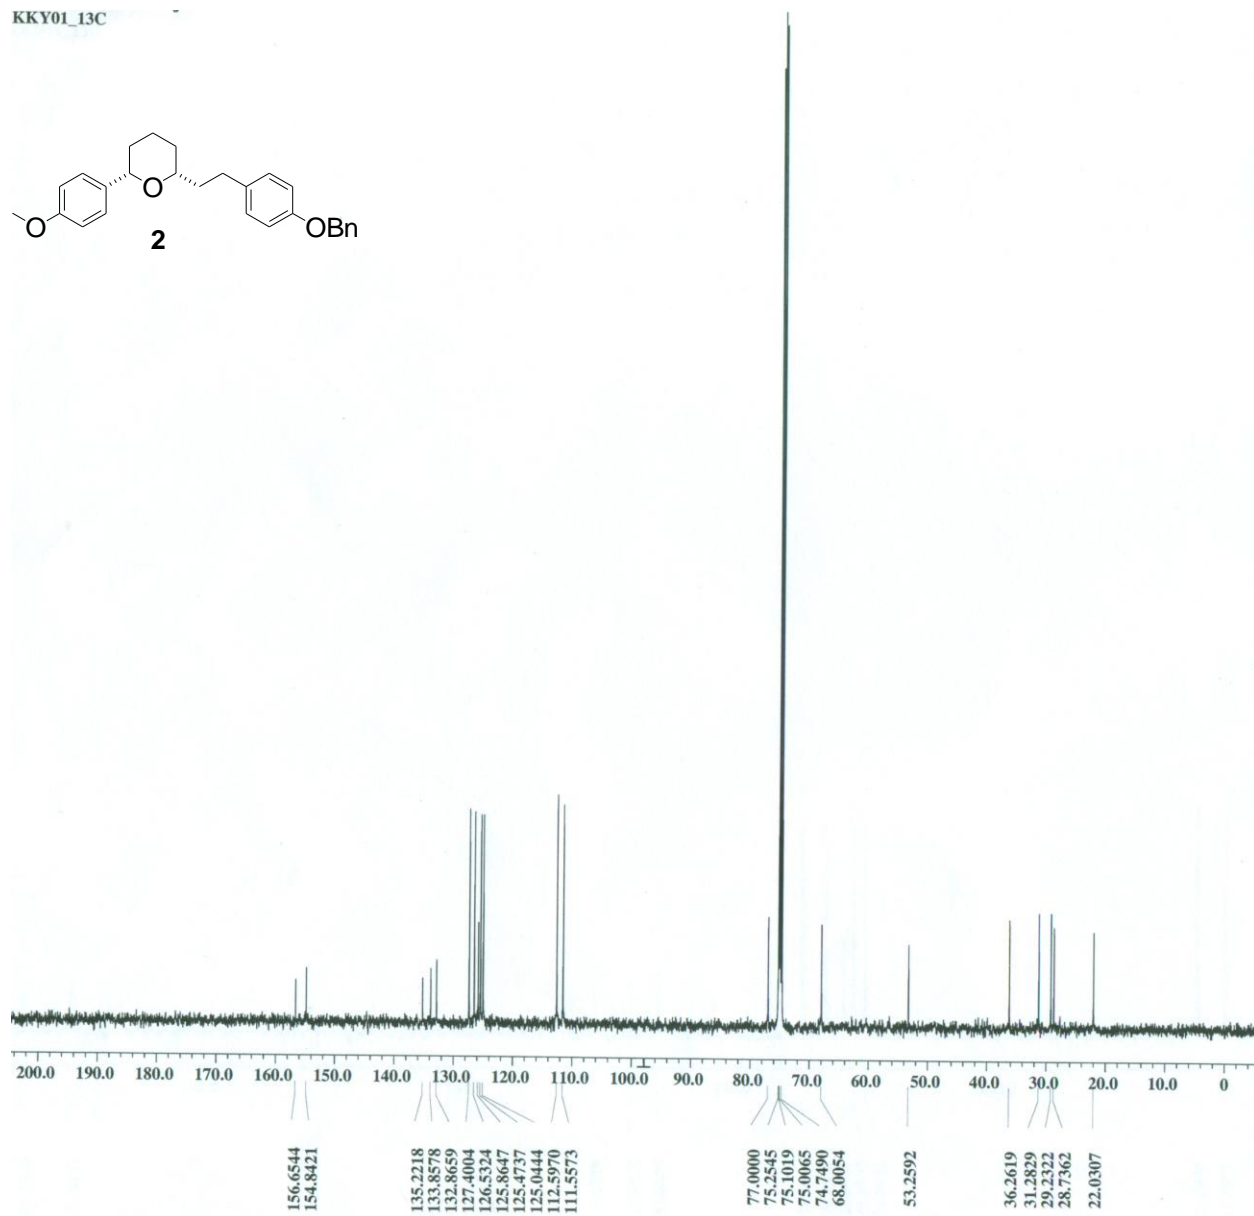

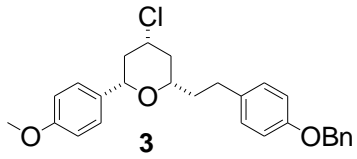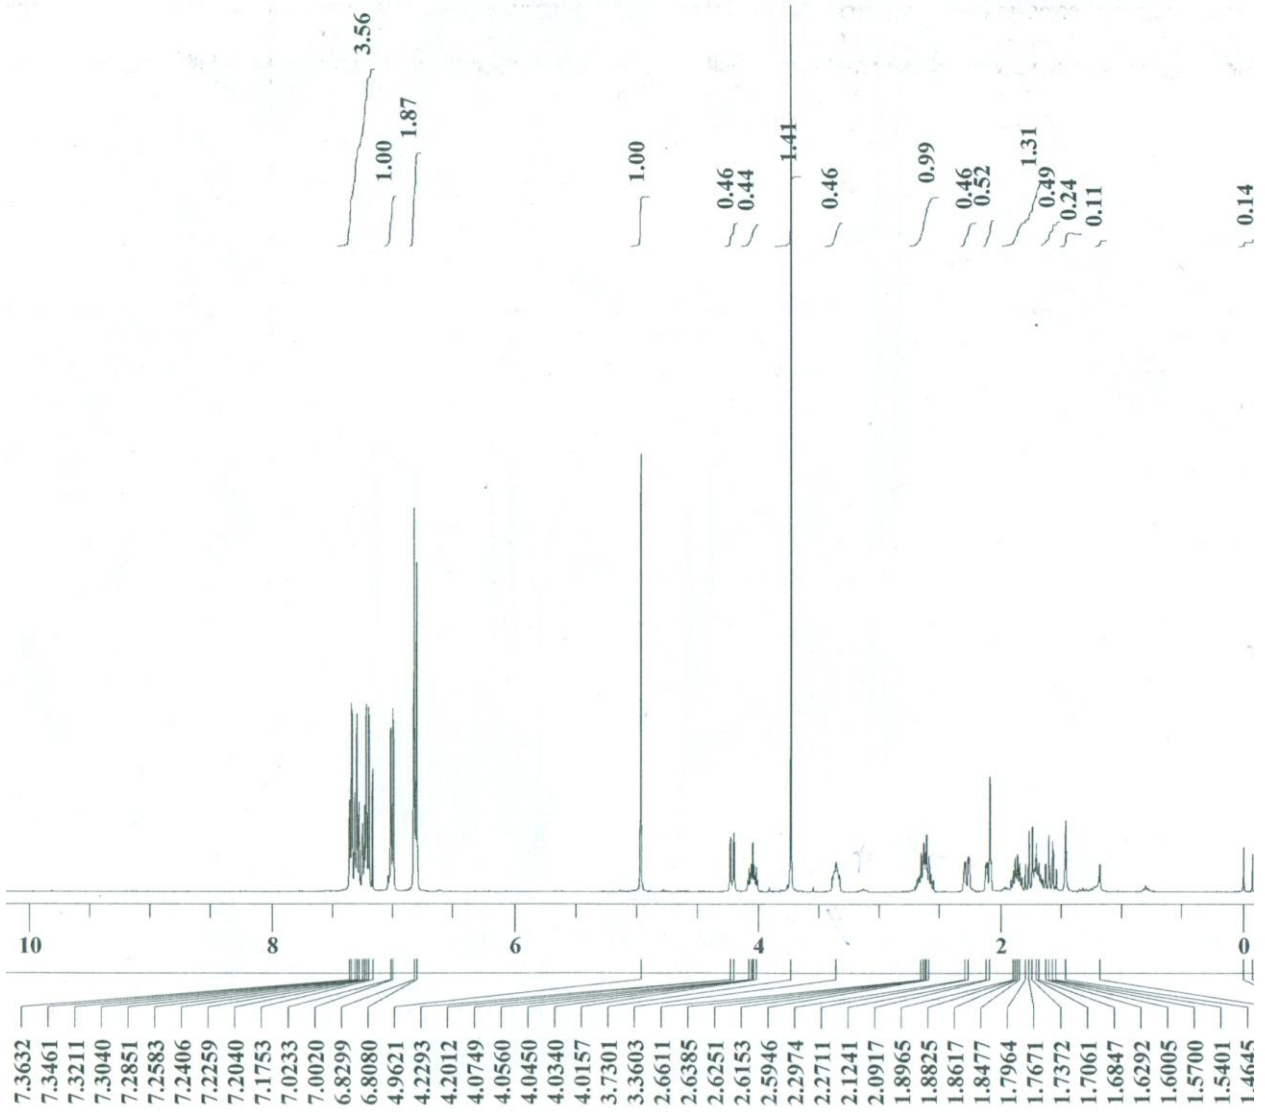



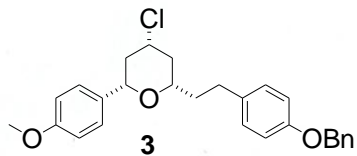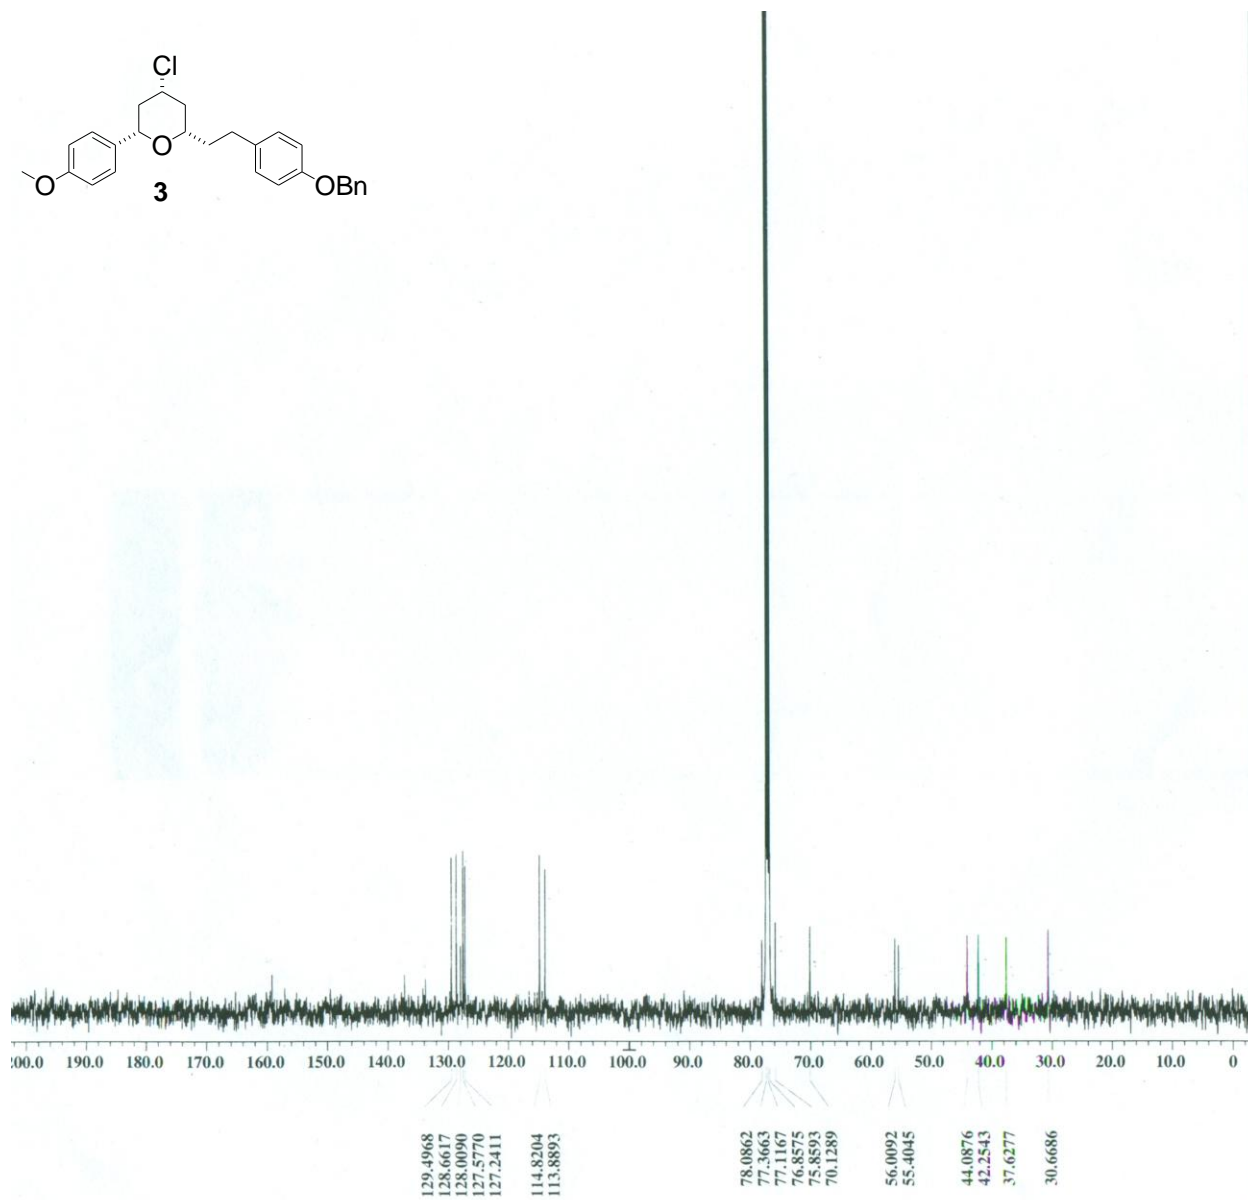

X : parts per Million : 13C

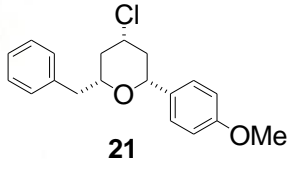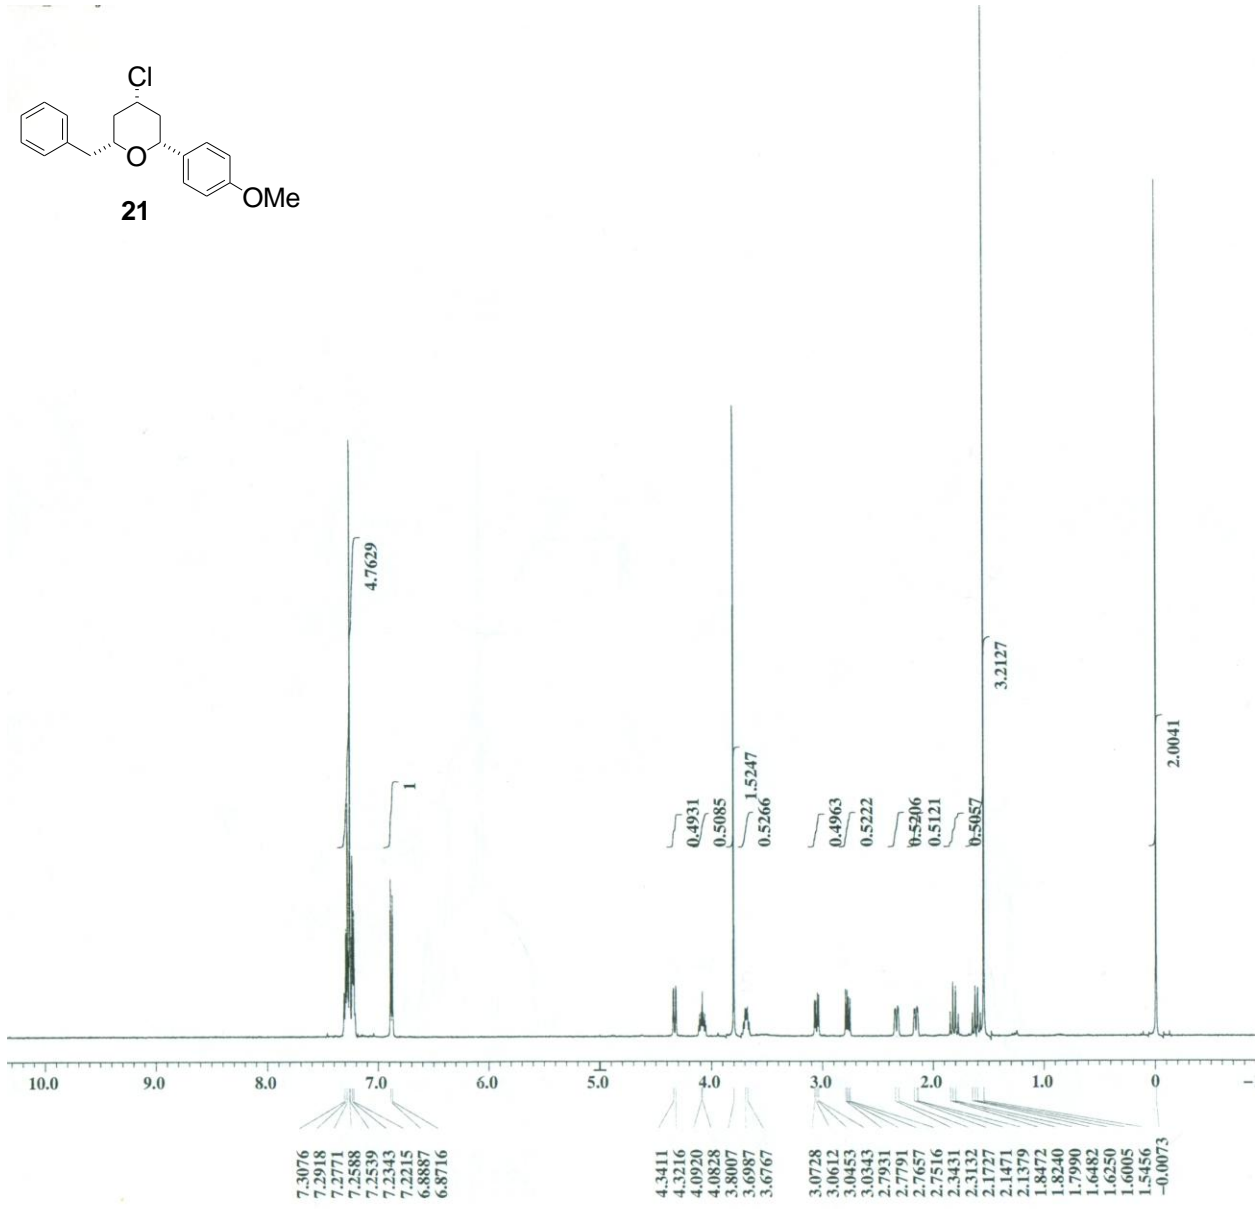

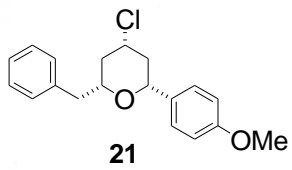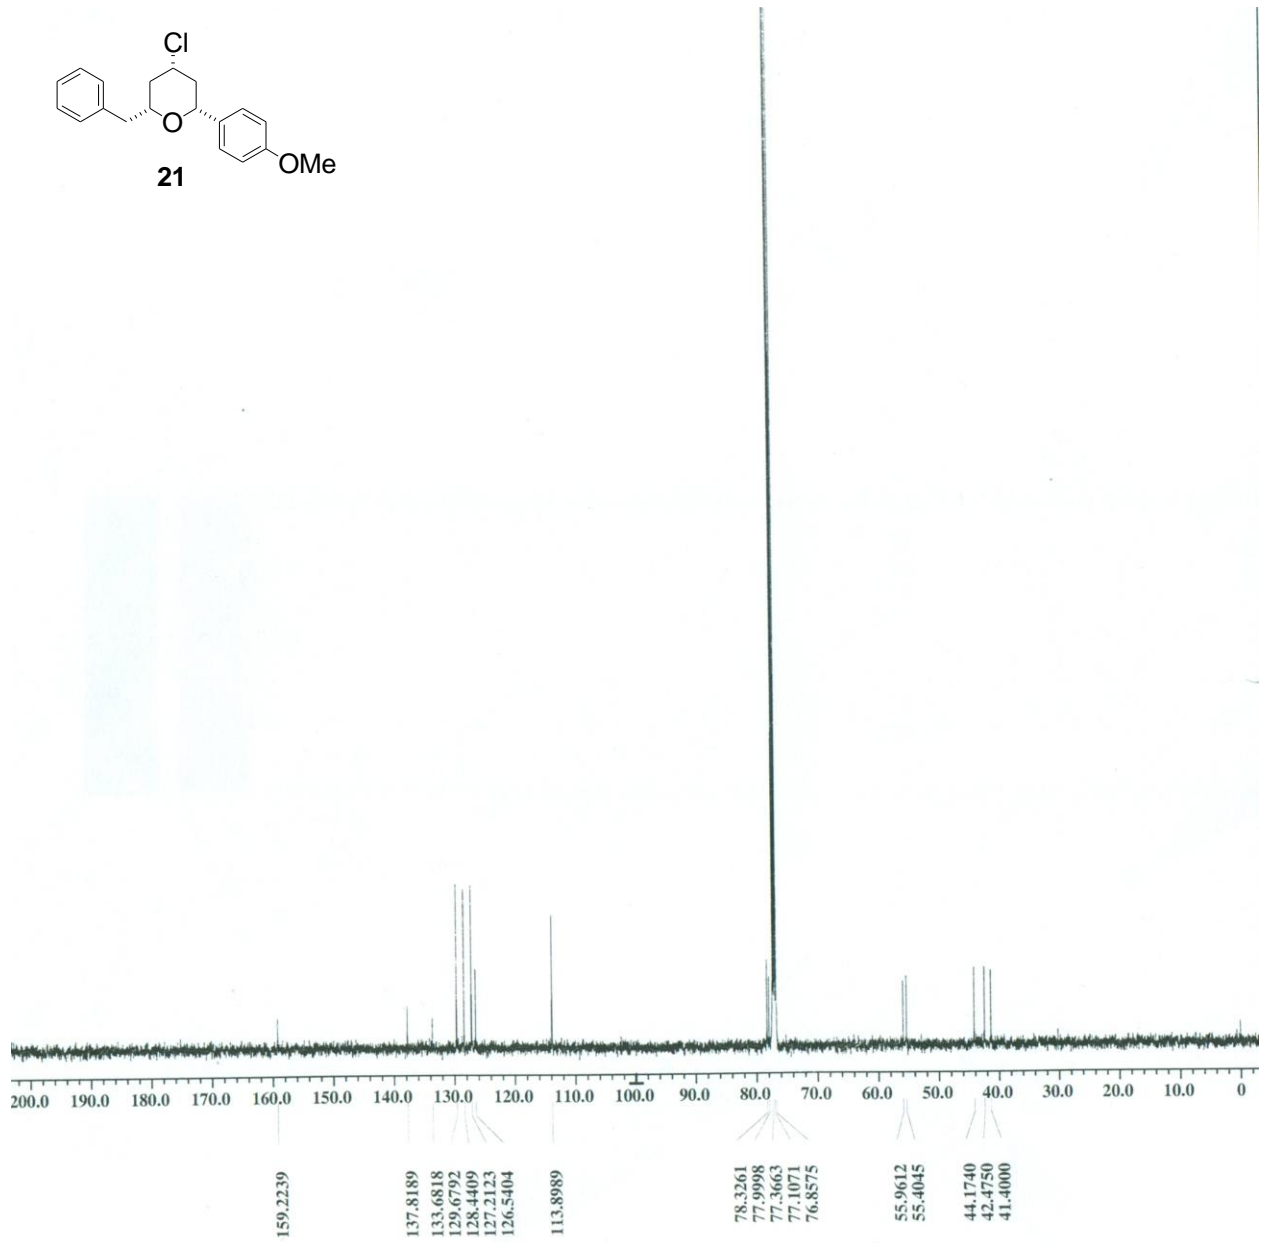

1.20\_111-7.111

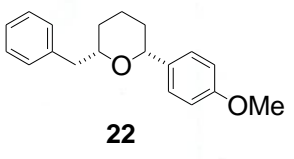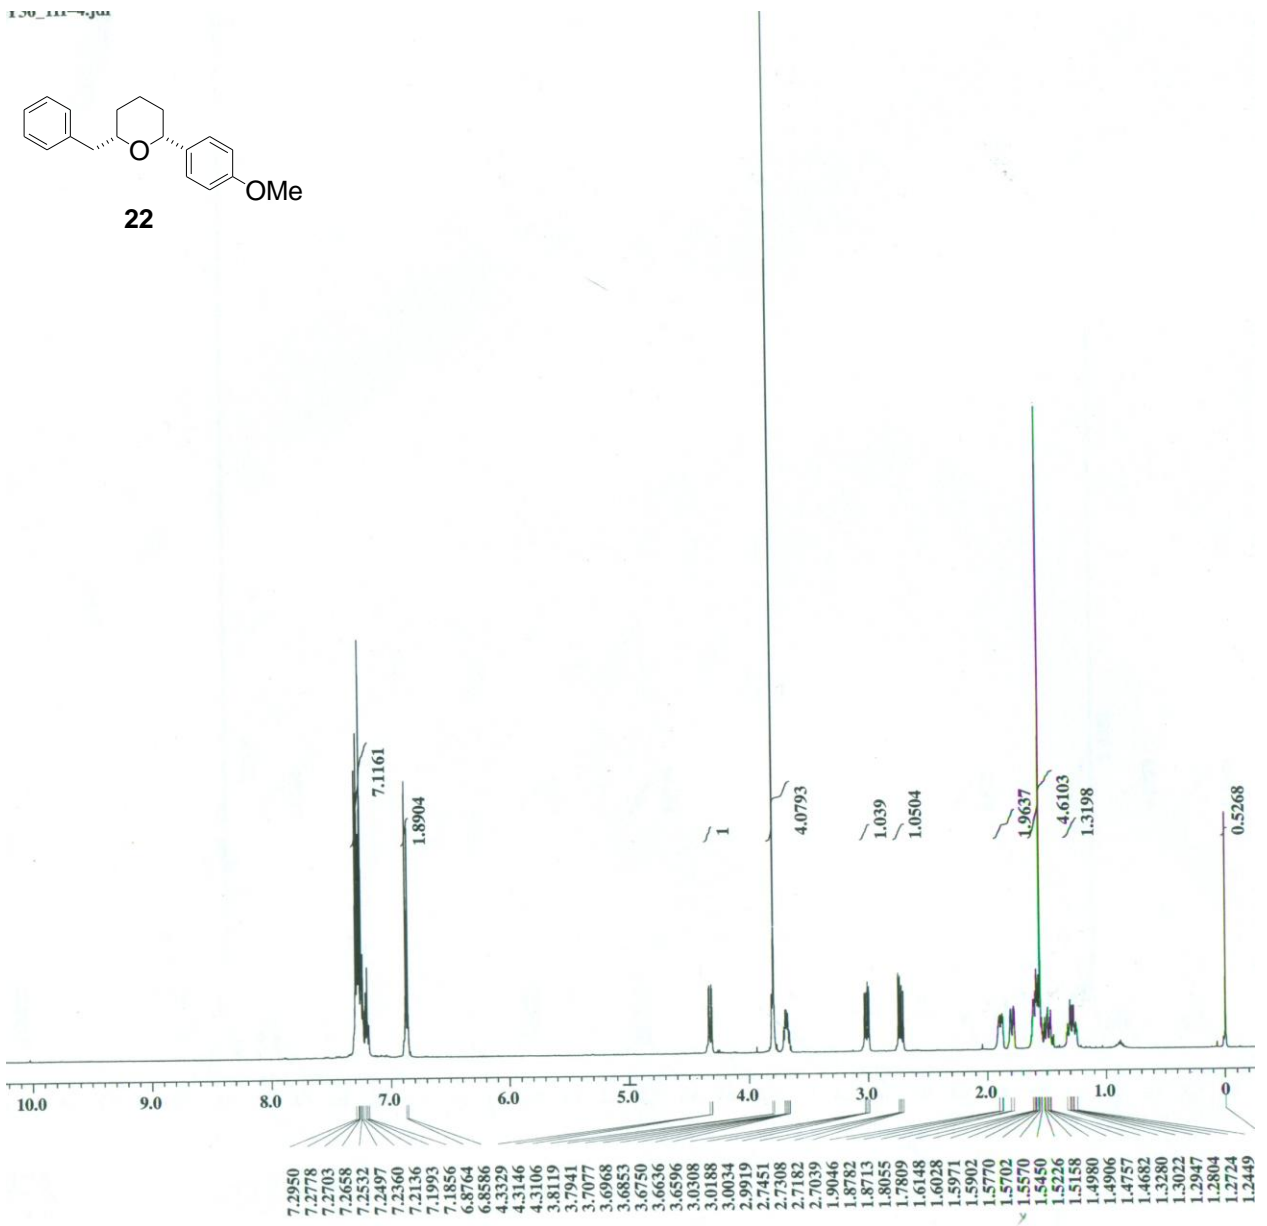

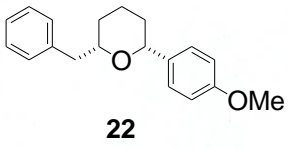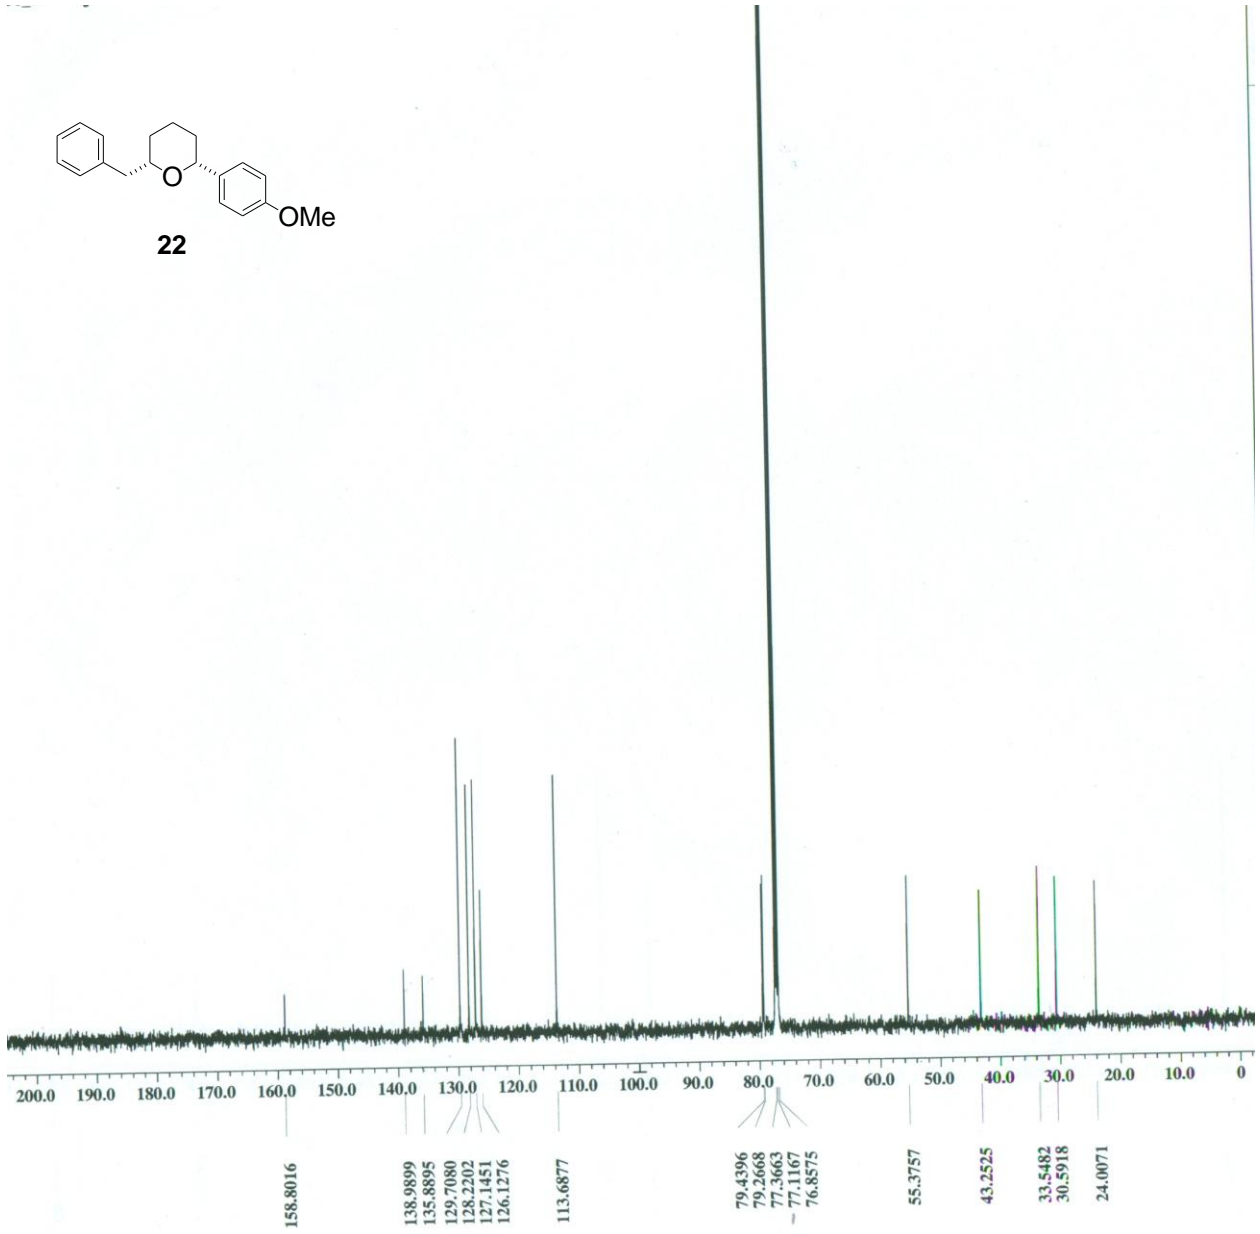

N\_1H

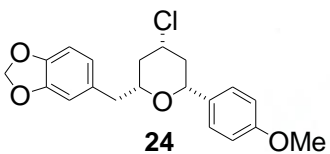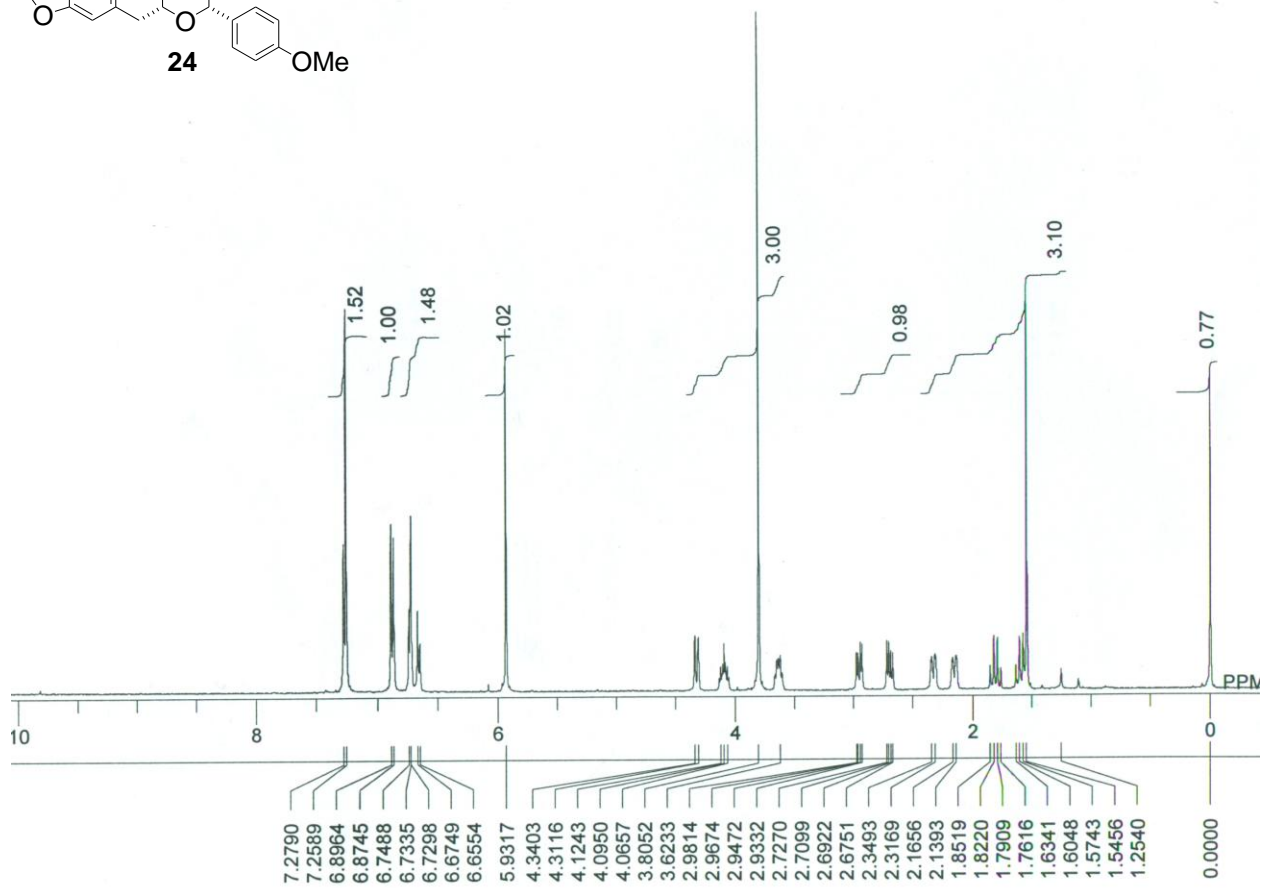

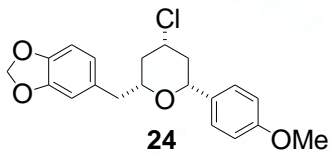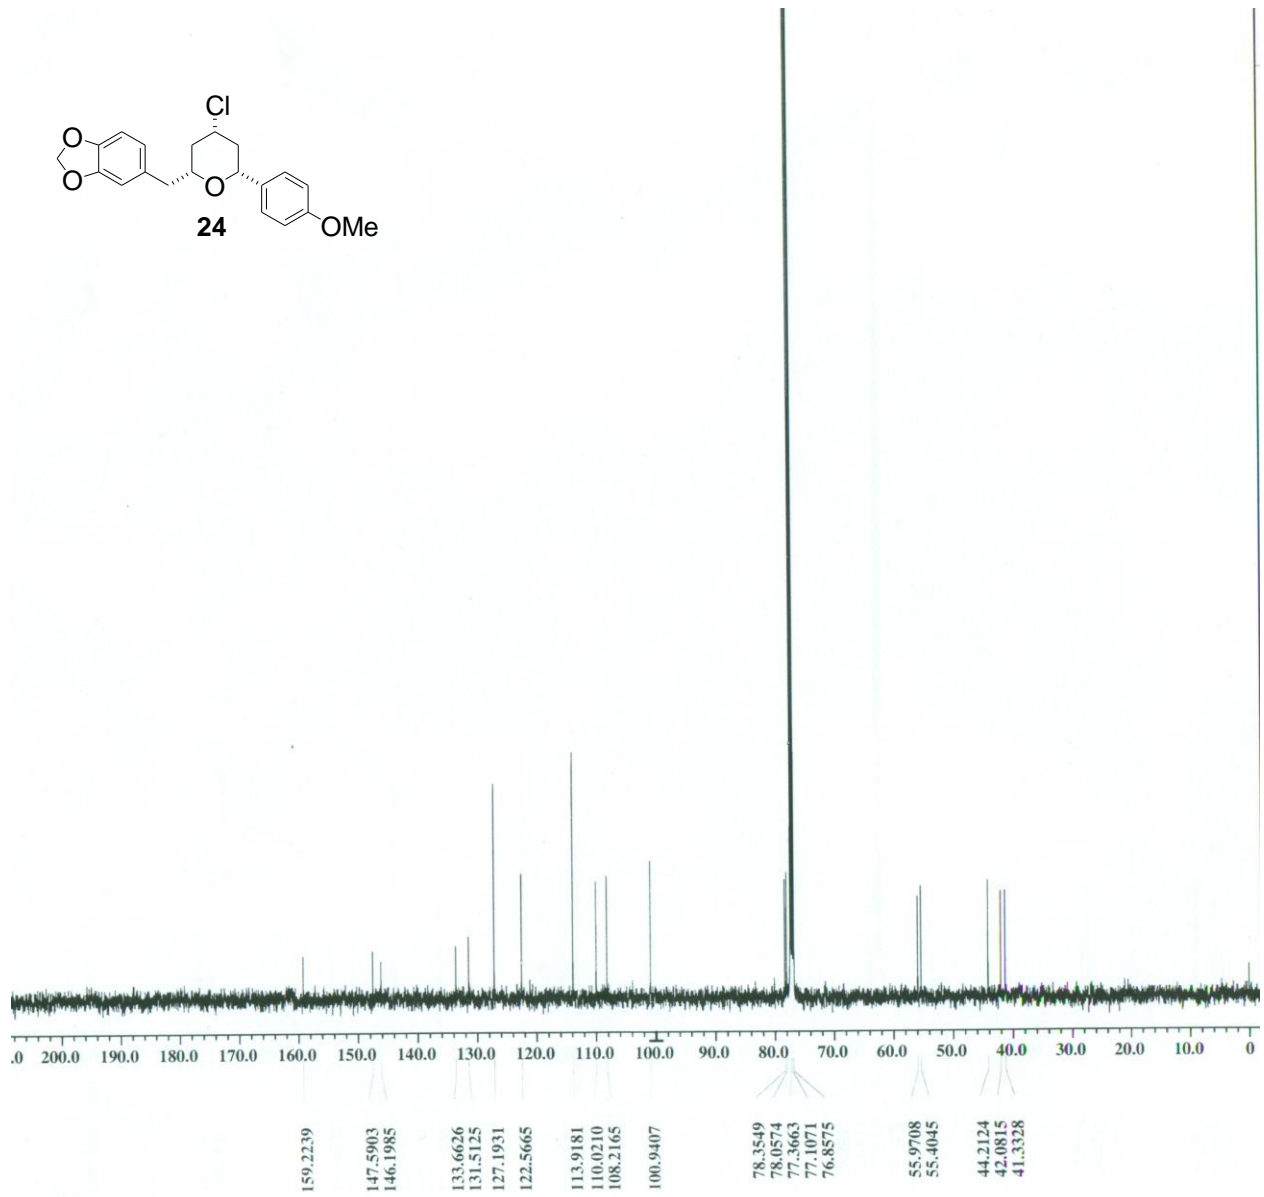

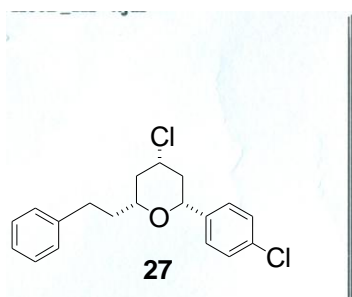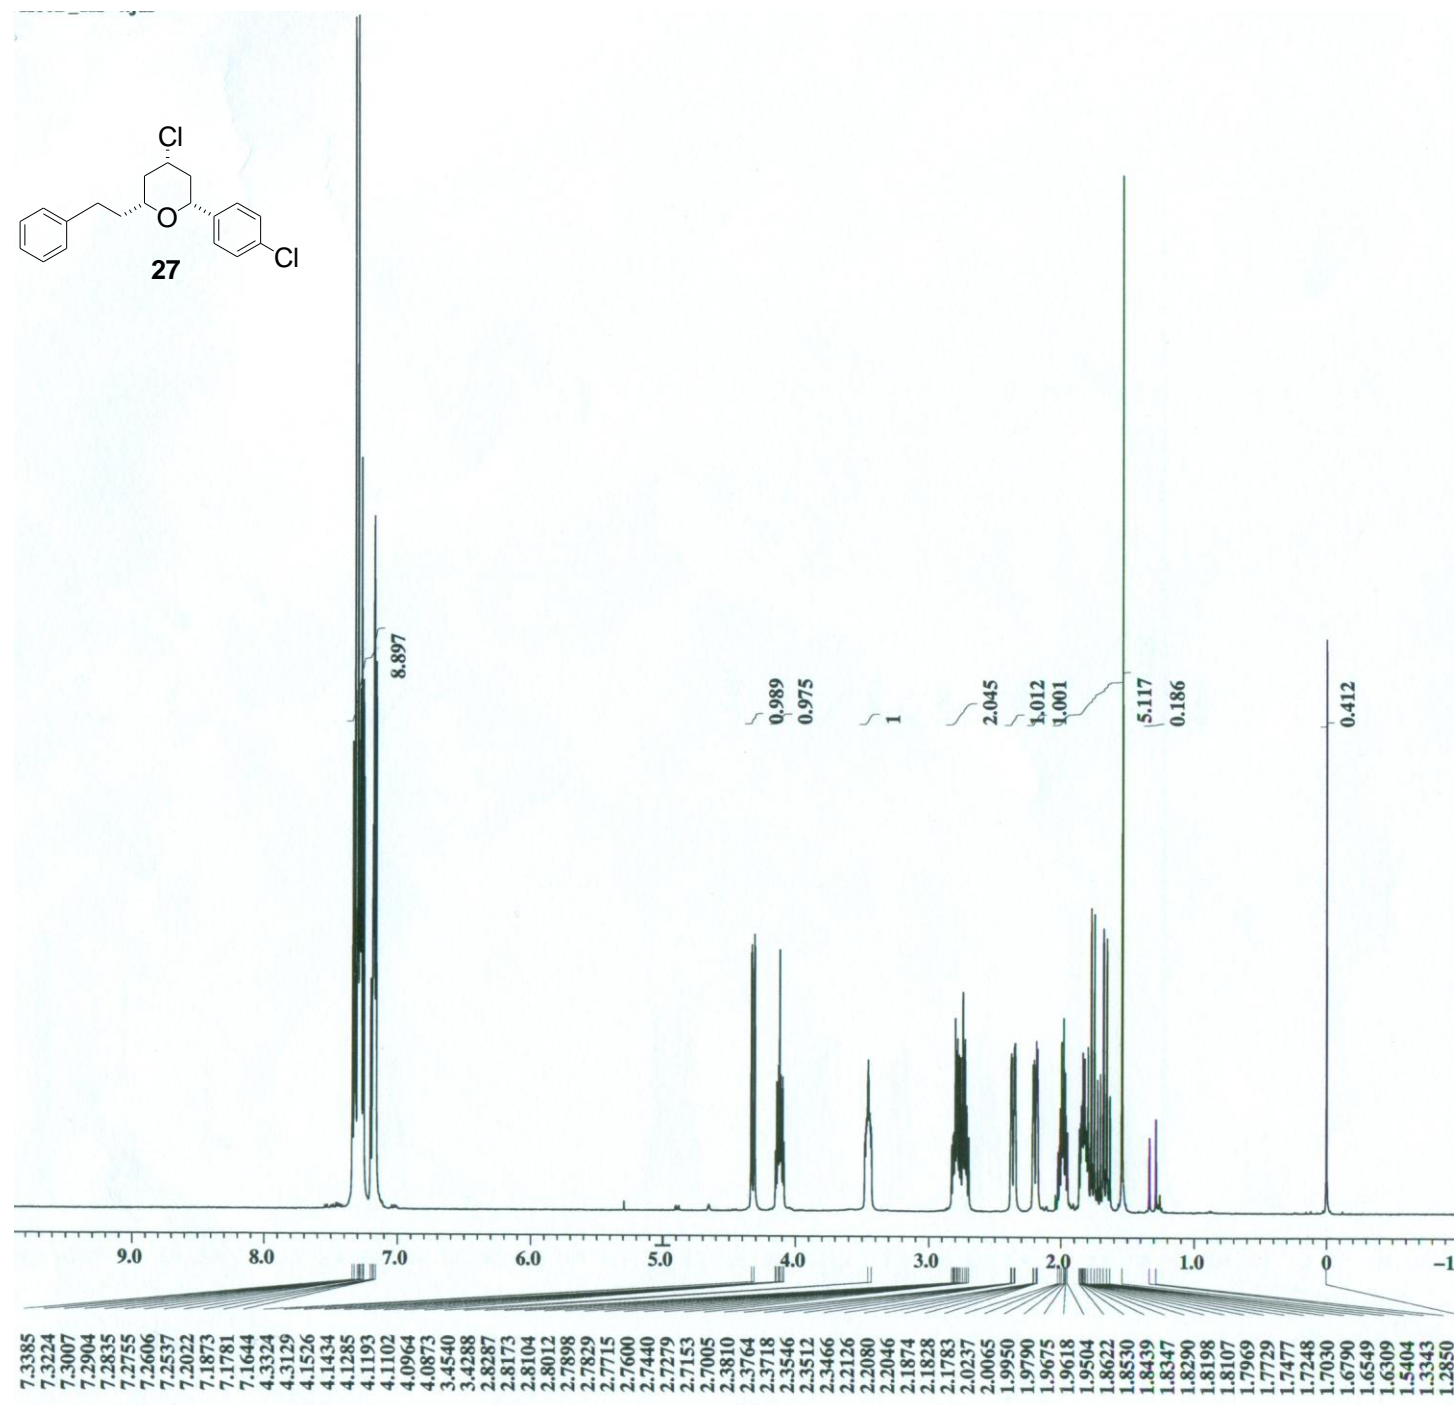



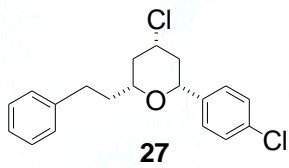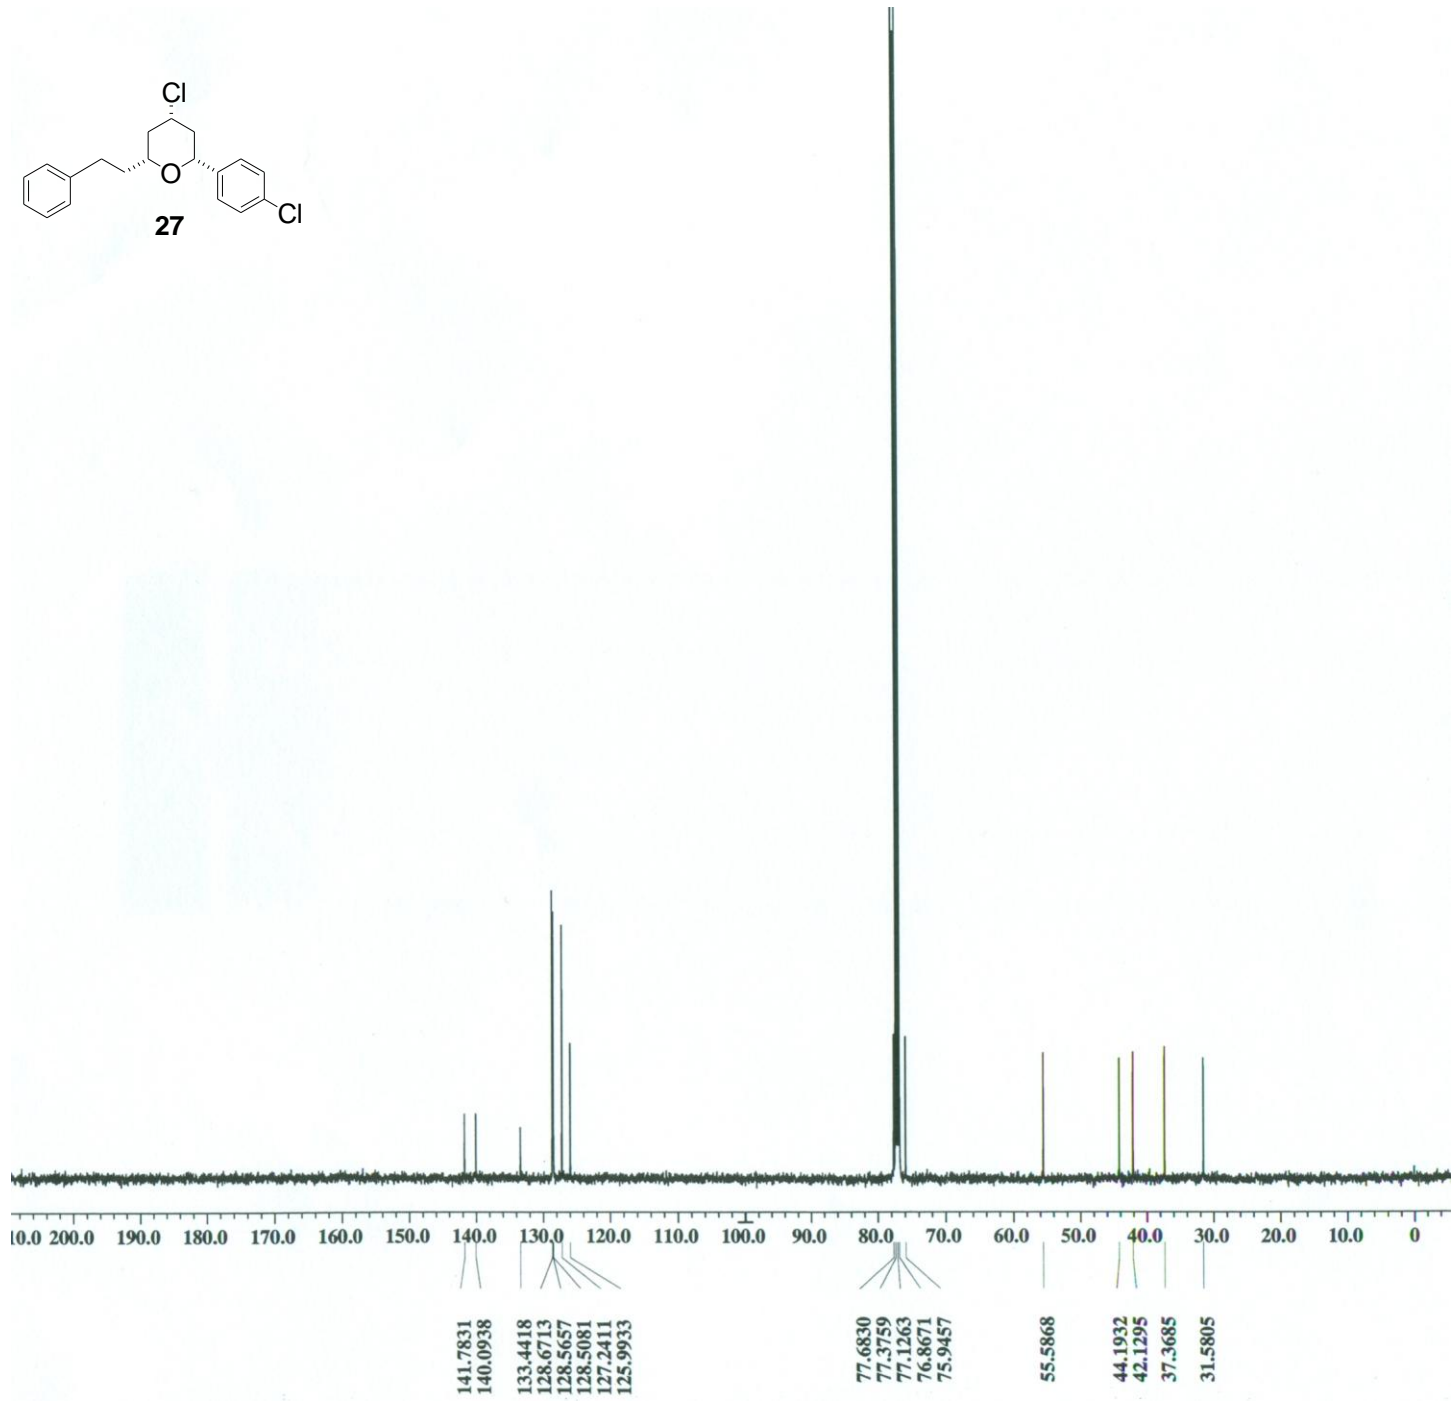

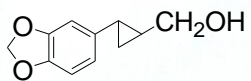

28

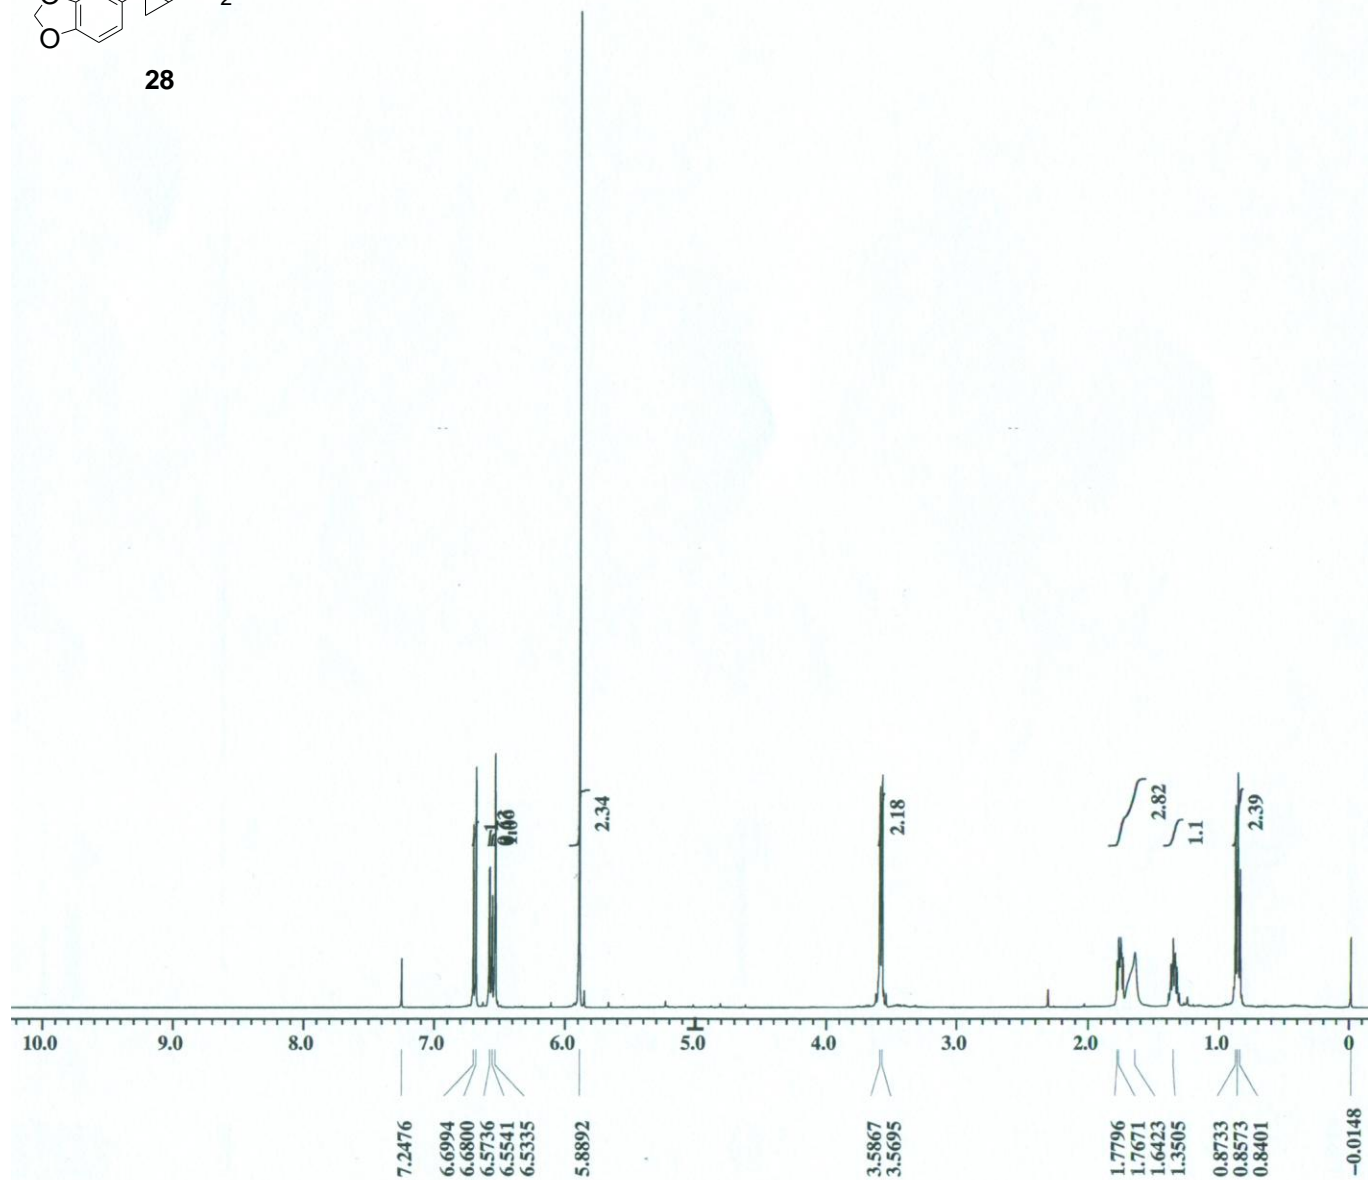

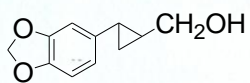

28

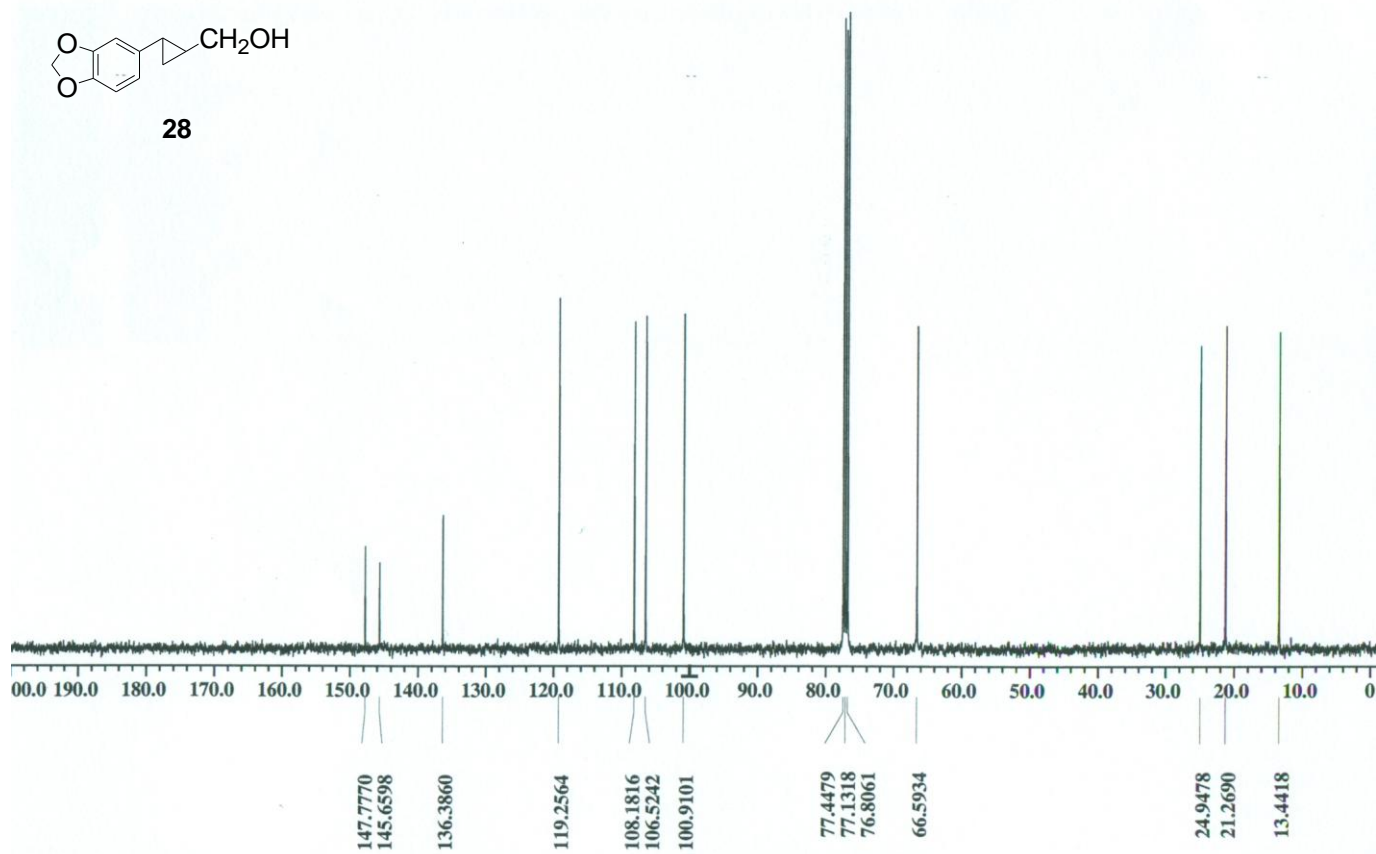

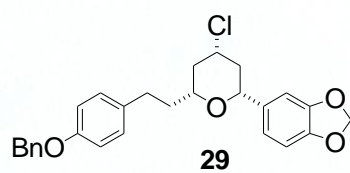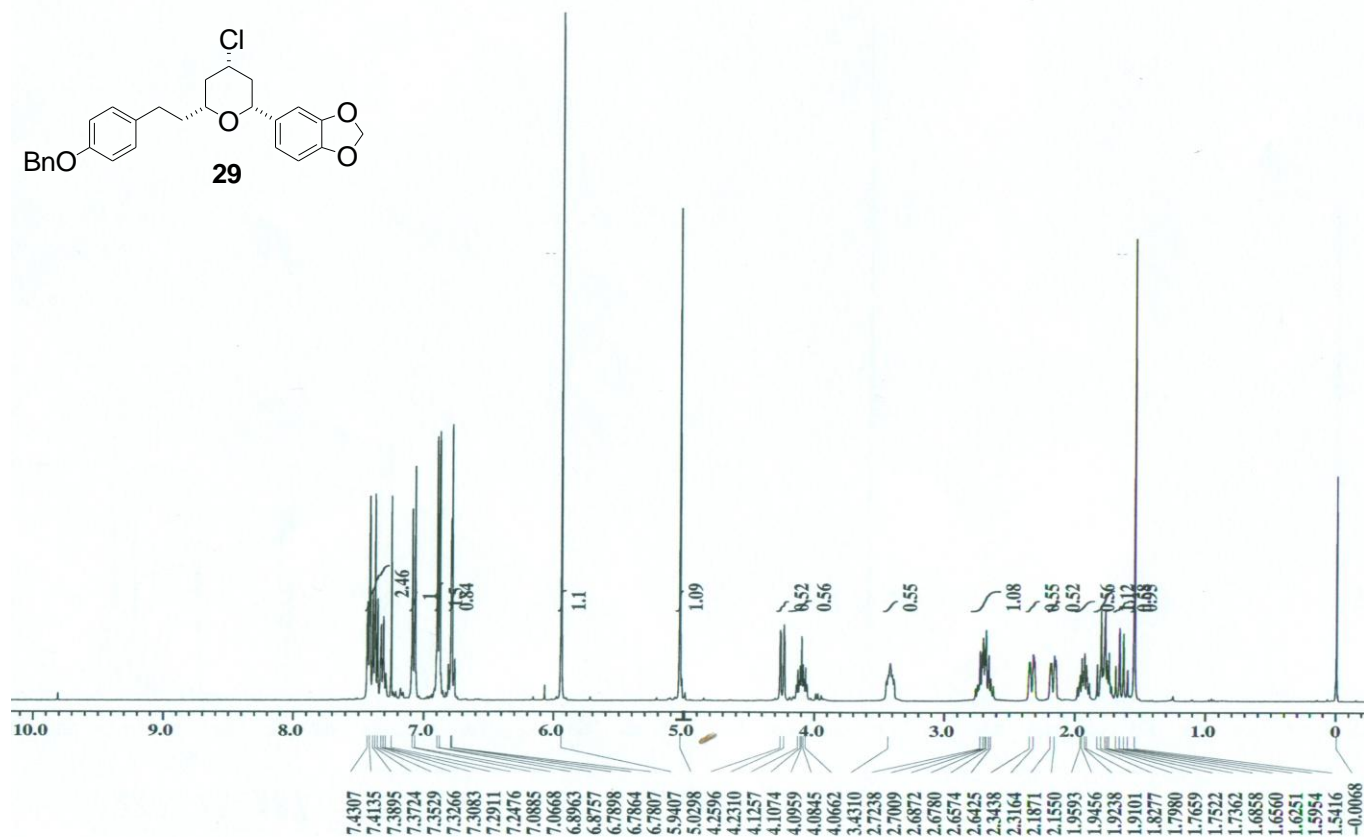

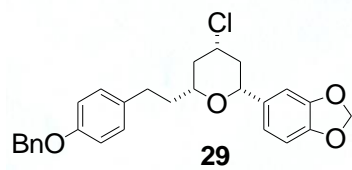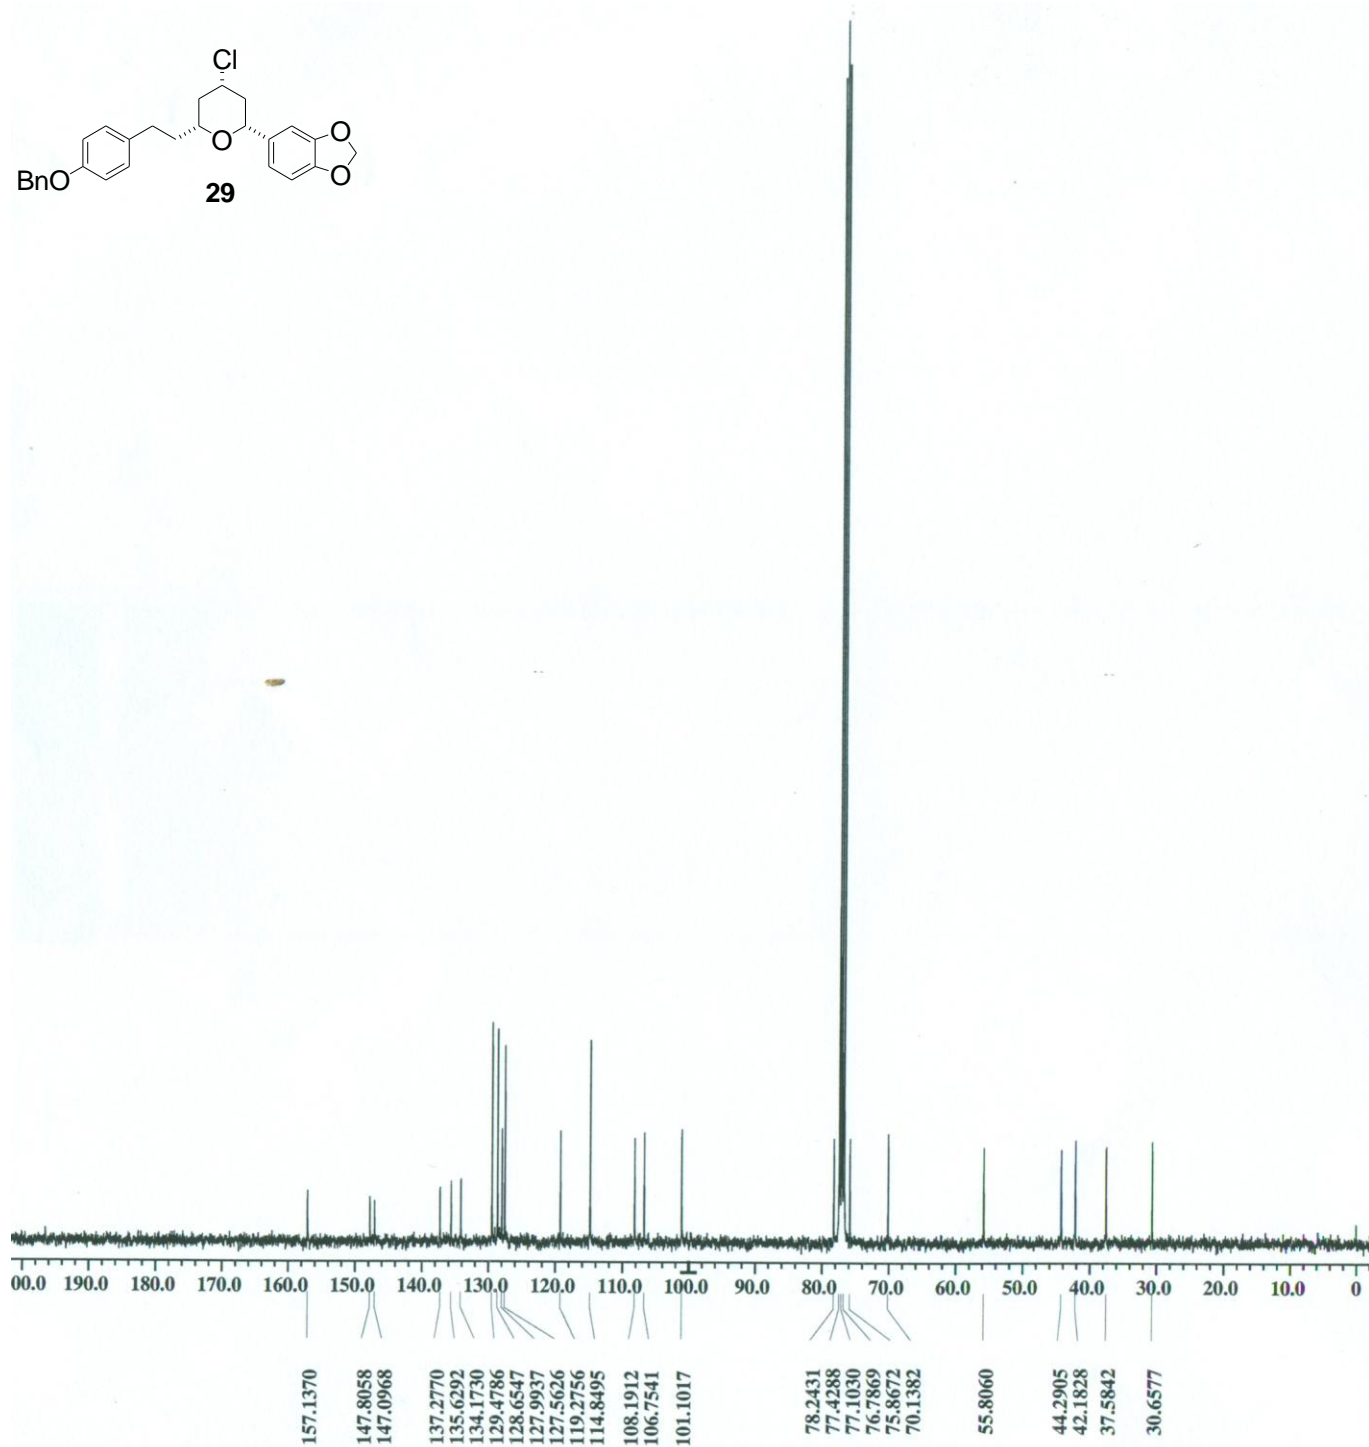

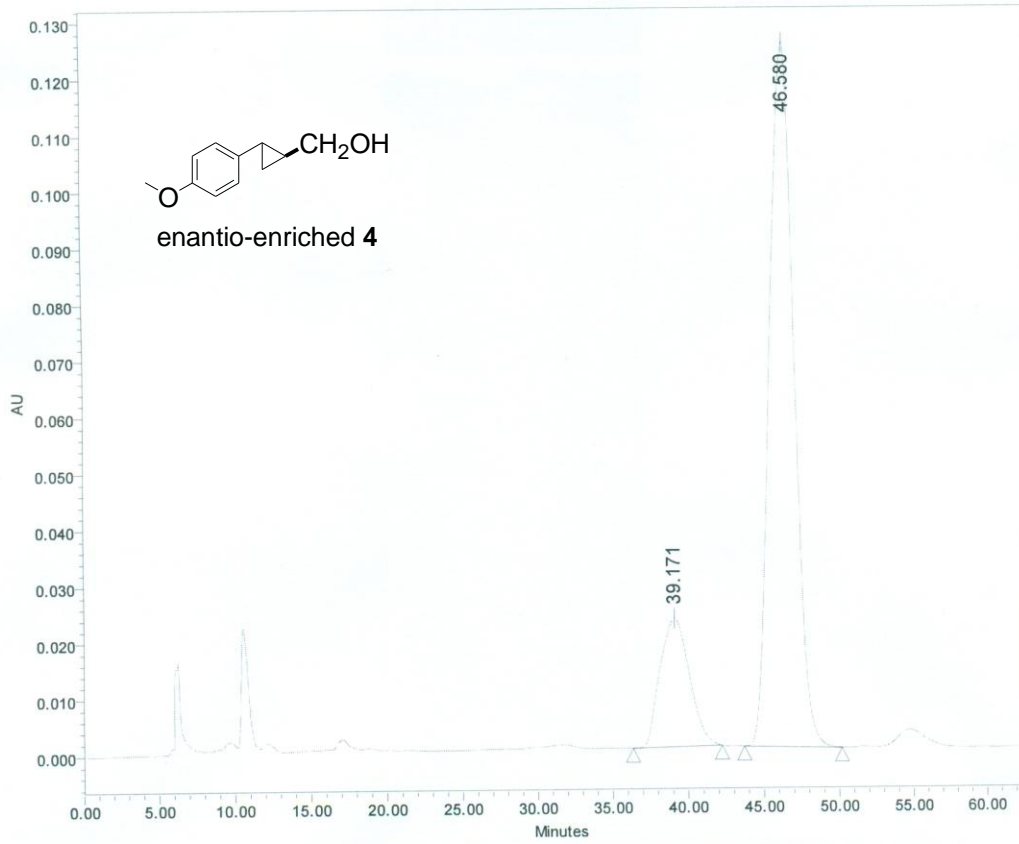

Sample Name: VKYD OD(0.5 mL); Date Acquired: 7/8/2014 3:03:35 PM IST; Vial: 1; Injection: 1

**Peak Summary with Statistics**

Name :

|           | Sample Name     | Vial | Inj | Retention Time (min) | Area     | % Area | Height |
|-----------|-----------------|------|-----|----------------------|----------|--------|--------|
| 1         | VKYD OD(0.5 mL) | 1    | 1   | 46.580               | 13981246 | 81.89  | 124999 |
| 2         | VKYD OD(0.5 mL) | 1    | 1   | 39.171               | 3092391  | 18.11  | 22828  |
| Mean      |                 |      |     | 42.876               |          |        |        |
| Std. Dev. |                 |      |     | 5.239                |          |        |        |

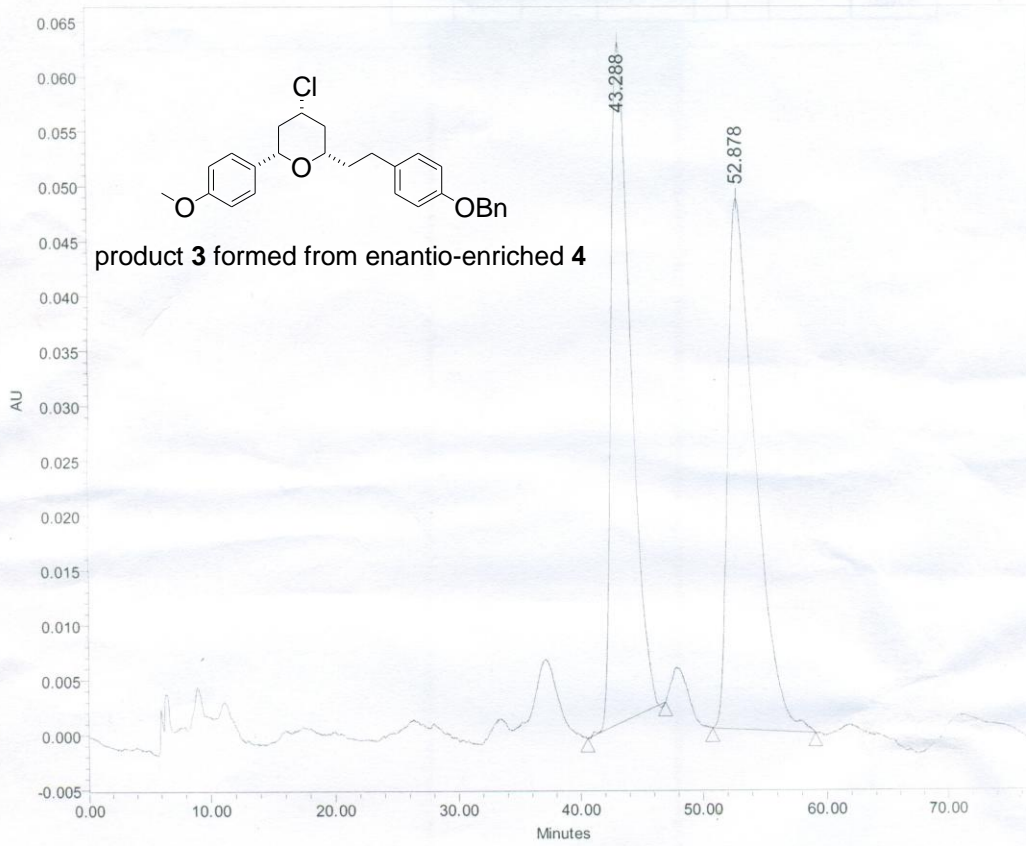

Peak Summary with Statistics

Name:

|           | Sample Name | Vial | Inj | Retention Time (min) | Area    | % Area | Height |
|-----------|-------------|------|-----|----------------------|---------|--------|--------|
| 1         | VKYD46      | 1    | 1   | 52.878               | 7417285 | 51.65  | 48406  |
| 2         | VKYD46      | 1    | 1   | 43.288               | 6942741 | 48.35  | 62063  |
| Mean      |             |      |     | 48.083               |         |        |        |
| Std. Dev. |             |      |     | 6.781                |         |        |        |

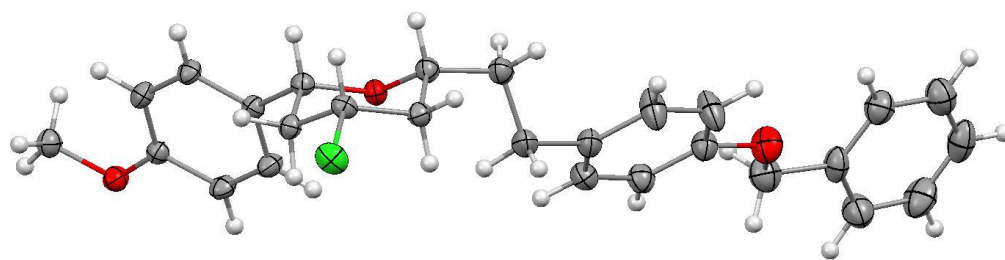

The ORTEP plot of the X-ray structure of (±)-3
